# Supplementary material for: Changes in the Proteome of Langat-Infected Ixodes scapularis ISE6 Cells: Metabolic Pathways Associated with Flavivirus Infection
Source: PLoS Negl Trop Dis. 2016 Feb 9;10(2):e0004180. doi: 10.1371/journal.pntd.0004180 (PMC4747643; doi:10.1371/journal.pntd.0004180)
Supplement: S2 Table — The total number of I. scapularis ISE6 proteins is based off of ≥1 peptide identification and ≥1 statistical analysis (p < 0.05) identification (four total analyses). From S1 Table, the filter process in detail is listed and Fig 2 is a pattern representation including the 486 proteins listed in S1 Table. Fold change of >2 corresponds to an increase expression, 0.5≤fold change≤2 denotes no change in expression, and fold change of <0.5 correlates with decreased expression. (XLSX) [file pntd.0004180.s007.xlsx]

## Sheet: 486 proteins by dataset color
Color coding	Identified out of 4 statistical datasets		VectorBase Accession ID	Name	# peptides	KEGG Ortholog	ISCW pathway	LGTV/MOCK Fold Change	UV-LGTV/MOCK Fold Change	LGTV/UV-LGTV Fold Change
ISCW018899-PA	All 4		ISCW020655-PA	16 kDa thioredoxion, putative	3			No Chg	0.477586	0.324185
ISCW015592-PA	only ANOVA		ISCW000908-PA	alpha tubulin, putative	5			0.284919	2.64093	0.283556
ISCW022213-PA	ANOVA and virus vs mock		ISCW018899-PA	alpha tubulin, putative	1			0.139476	No Chg	No Chg
ISCW015602-PA	ANOVA and uvvirus vs mock		ISCW001951-PA	ATPase inhibitor, putative	1			No Chg	8.53972	4.04669
ISCW004779-PA	ANOVA, virus vs mock, and uvvirus vs mock		ISCW005137-PA	beta-tubulin, putative	12			No Chg	No Chg	No Chg
ISCW024315-PA	ANOVA, virus vs mock, and virus vs uvvirus		ISCW007069-PA	brain acid soluble protein, putative	2			0.104063	0.231337	0.104395
ISCW009367-PA	ANOVA, uvvirus vs mock, and virus vs uvvirus		ISCW021456-PA	calcyphosine/tpp, putative	1			0.280592	No Chg	8.65614
ISCW006983-PA	virus vs mock, uvvirus vs mock, and virus vs uvvirus		ISCW021202-PA	calponin, putative	6			0.398864	0.366113	No Chg
ISCW023355-PA	virus vs mock only		ISCW002354-PA	calumenin, putative	6			No Chg	No Chg	0.1
ISCW023837-PA	virus vs mock and uvvirus vs mock		ISCW006744-PA	caveolin, putative	1			0.112699	No Chg	No Chg
ISCW020189-PA	uvvirus vs mock and virus vs uvvirus		ISCW011373-PA	Cniwi protein, putative	5			2.21654	3.02515	0.284881
ISCW008709-PA	virus vs mock and virus vs uvvirus		ISCW006441-PA	coiled-coil tumor protein D52, putative	1			11.9344	4.6432	2.68741
ISCW008741-PA	uvvirus vs mock only		ISCW005014-PA	conserved hypothetical protein	6			0.275109	0.239328	0.130305
ISCW017361-PA	virus vs uvvirus only		ISCW009590-PA	conserved hypothetical protein	2			0.0652158	0.383444	No Chg
			ISCW009705-PA	conserved hypothetical protein	5			No Chg	2.90751	No Chg
			ISCW011052-PA	conserved hypothetical protein	1			0.1	2.51851	0.1
			ISCW019749-PA	conserved hypothetical protein	6			0.154192	0.187352	No Chg
			ISCW020127-PA	conserved hypothetical protein	2			9.18617	6.47138	0.1
			ISCW023694-PA	conserved hypothetical protein	1			10.1506	11.4515	No Chg
			ISCW022108-PA	cytochrome B5, putative	3			No Chg	No Chg	2.21357
			ISCW001850-PA	DEK domain-containing protein, putative	4			0.401938	0.46609	No Chg
			ISCW008291-PA	failed axon connections, putative	5			0.366821	No Chg	No Chg
			ISCW004404-PA	fascin, putative	1			0.135706	No Chg	0.397415
			ISCW015316-PA	fatty acid-binding protein FABP, putative	7			No Chg	No Chg	No Chg
			ISCW002430-PA	FKBP-type peptidyl-prolyl cis-trans isomerase, putative	2			0.392034	2.84432	0.1
			ISCW004858-PA	G-3-P dehydrogenase, putative	9			No Chg	No Chg	No Chg
			ISCW017892-PA	GDI-1 GDP dissociation inhibitor, putative	5			No Chg	No Chg	No Chg
			ISCW017709-PA	heat shock protein 20.6, putative	5			0.236811	0.338881	No Chg
			ISCW001762-PA	heat shock protein, putative	6			0.152216	0.208456	2.51204
			ISCW016090-PA	heat shock protein, putative	10			0.320318	No Chg	0.339866
			ISCW013046-PA	histone H2B, putative	1			0.1	0.0546723	10.3711
			ISCW010025-PA	hypothetical protein	1			No Chg	9.2494	No Chg
			ISCW011195-PA	hypothetical protein	3			2.28653	No Chg	No Chg
			ISCW011299-PA	hypothetical protein	2			0.155514	0.1	0.1
			ISCW020576-PA	hypothetical protein	3			9.40712	3.08981	No Chg
			ISCW002553-PA	integrin beta subunit, putative	2			9.25318	11.1878	No Chg
			ISCW001123-PA	Mapmodulin, putative	2			0.1	0.1	No Chg
			ISCW019002-PA	mitogen activated protein kinase kinase kinase 3, MAPKKK3, MEKK3, putative	2			0.284258	0.166555	2.79803
			ISCW021572-PA	proteasome subunit alpha type, putative	2			11.3505	No Chg	No Chg
			ISCW000621-PA	protein hu-li tai shao, putative	3			0.146331	0.112892	No Chg
			ISCW023109-PA	quinone oxidoreductase, putative	2			0.382383	No Chg	No Chg
			ISCW015987-PA	ras GTP exchange factor, putative	1			0.12257	0.395405	9.90296
			ISCW021398-PA	RNA binding motif-containing protein, putative	3			No Chg	No Chg	No Chg
			ISCW024717-PA	secreted salivary gland peptide, putative	5			No Chg	No Chg	No Chg
			ISCW018577-PA	short-chain dehydrogenase, putative	3			No Chg	3.70784	0.1
			ISCW009878-PA	thiol-disulfide isomerase, putative	3			No Chg	0.380449	No Chg
			ISCW011870-PA	UBX domain-containing protein, putative	1			0.1	No Chg	0.1
			ISCW022270-PA	VAMP-associated protein involved in inositol metabolism, putative	2			0.213674	No Chg	No Chg
			ISCW013727-PA	vitellogenin, putative	2			0.360406	0.091318	0.136604
			ISCW000012-PA	spectrin alpha chain, putative	6	K06114 spectrin alpha		0.424677	0.274412	0.449997
			ISCW000339-PA	lamin, putative	18	K07611 lamin B		0.245404	No Chg	2.71245
			ISCW001124-PA	nonmuscle myosin essential light chain	4	K12752 myosin light chain, invertebrate		0.165745	0.170186	No Chg
			ISCW001739-PA	proline and glutamine-rich splicing factor (SFPQ), putative	12	K13219 splicing factor, proline- and glutamine-rich		0.413158	No Chg	No Chg
			ISCW002300-PA	Core histone H2A/H2B/H3/H4	5	K11253 histone H3		0.405786	No Chg	3.21259
			ISCW005319-PA	KH domain RNA binding protein, putative	5	K13210 far upstream element-binding protein		0.420294	No Chg	No Chg
			ISCW006034-PA	secreted salivary gland peptide, putative	3	K03671 thioredoxin 1		No Chg	2.66804	No Chg
			ISCW006326-PA	actin depolymerizing factor, putative	6	K05765 cofilin		0.045483	0.196622	2.22905
			ISCW006566-PA	FK506 binding protein (FKBP), putative	4	K09571 FK506-binding protein 4/5		No Chg	No Chg	No Chg
			ISCW006702-PA	microtubule-binding protein, putative	4	K10436 microtubule-associated protein, RP/EB family		0.0648315	0.252081	No Chg
			ISCW007582-PA	zinc finger protein, putative	5	K13203 zinc finger RNA-binding protein		0.137318	No Chg	0.135023
			ISCW008497-PA	cyclophilin A, putative	4	K09565 peptidyl-prolyl isomerase F (cyclophilin D)		0.275215	0.347997	No Chg
			ISCW011376-PA	multifunctional chaperone, putative	5	K06630 tyrosine 3-monooxygenase/tryptophan 5-monooxygenase activation protein		0.309126	No Chg	No Chg
			ISCW012234-PA	histone, putative	4	K11275 histone H1/5		0.136202	0.0411118	0.116905
			ISCW012592-PA	transcription factor containing NAC and TS-N domains, putative	3	K03626 nascent polypeptide-associated complex subunit alpha		0.136368	No Chg	No Chg
			ISCW013566-PA	alpha-actinin, putative	6	K05699 actinin alpha		No Chg	2.8799	0.169486
			ISCW014936-PA	abhydrolase domain-containing protein, putative	1	K13704 abhydrolase domain-containing protein 12		8.76822	No Chg	No Chg
			ISCW015012-PA	flotillin, putative	1	K07192 flotillin		0.1	No Chg	No Chg
			ISCW015380-PA	elongation factor, putative	11	K03234 elongation factor 2		0.216712	No Chg	No Chg
			ISCW016230-PA	histone H1, putative	4	K11275 histone H1/5		0.348614	No Chg	0.487754
			ISCW017579-PA	transcription factor NFAT, subunit NF45, putative	4	K13089 interleukin enhancer-binding factor 2		0.491227	No Chg	No Chg
			ISCW017823-PA	heat shock protein	2	K04078 chaperonin GroES		0.1	0.11721	No Chg
			ISCW018424-PA	Ran-binding protein, putative	1	K15306 Ran-binding protein 1		0.0872692	0.173399	2.28952
			ISCW018470-PA	double-stranded RNA-specific editase B2, putative	4	K13194 double stranded RNA-specific editase B		0.42849	2.2769	0.225711
			ISCW019496-PA	histone H2B, putative	5	K11252 histone H2B		0.0272395	0.137304	0.152096
			ISCW019498-PA	histone H4, putative	8	K11254 histone H4		No Chg	No Chg	0.419528
			ISCW020878-PA	rho GDP dissociation inhibitor, putative	3	K12462 Rho GDP-dissociation inhibitor		No Chg	2.42961	0.325521
			ISCW021350-PA	DNA replication factor/protein phosphatase inhibitor SET/SPR-2, putative	7	K11290 template-activating factor I		0.252809	No Chg	No Chg
			ISCW021452-PA	vinculin, putative	8	K05700 vinculin		0.314374	No Chg	No Chg
			ISCW023148-PA	profilin, putative	3	K05759 profilin		0.1	0.319777	No Chg
			ISCW023394-PA	ubiquitin carboxyl-terminal hydrolase isozyme L3, putative	1	K05609 ubiquitin carboxyl-terminal hydrolase L3		2.33715	No Chg	2.33562
			ISCW013384-PA	molecular chaperone, putative	2	K09502 DnaJ homolog subfamily A member 1	Protein processing in endoplasmic reticulum	No Chg	2.81933	0.1
			ISCW015982-PA	aldehyde dehydrogenase, putative	7	K00294 1-pyrroline-5-carboxylate dehydrogenase	Alanine, aspartate and glutamate metabolism""Arginine and proline metabolism	2.69035	5.06363	No Chg
			ISCW017703-PA	CNDP dipeptidase, putative	6	K08660 cytosolic nonspecific dipeptidase	Arginine and proline metabolism""Histidine metabolism"" beta-Alanine metabolism	No Chg	No Chg	No Chg
			ISCW017350-PA	DNA-binding protein, putative	6	K10802 high mobility group protein B1	Base excision repair	0.345872	0.408586	5.63379
			ISCW019519-PA	poly [ADP-ribose] polymerase, putative	2	K10798 poly [ADP-ribose] polymerase	Base excision repair""BER complex	9.25196	No Chg	No Chg
			ISCW001977-PA	NADP-dependent isocitrate dehydrogenase, putative	6	K00031 isocitrate dehydrogenase	Citrate cycle (TCA cycle)""Glutathione metabolism"" Peroxisome	No Chg	No Chg	No Chg
			ISCW015944-PA	S-adenosylhomocysteine hydrolase, putative	3	K01251 adenosylhomocysteinase	Cysteine and methionine metabolism""Methionine degradation	0.123538	No Chg	No Chg
			ISCW007146-PA	RNA-binding protein musashi, putative	6	K03102 squid	Dorso-ventral axis formation	No Chg	No Chg	No Chg
			ISCW021969-PA	RAB-9 and, putative	2	K07897 Ras-related protein Rab-7A	Endocytosis""Phagosome	No Chg	3.6115	No Chg
			ISCW022157-PA	glutathione S-transferase, putative	10	K00799 glutathione S-transferase	Glutathione metabolism""Metabolism of xenobiotics by cytochrome P450""Drug metabolism - cytochrome P450	0.337306	0.321657	4.06387
			ISCW014613-PA	aldehyde dehydrogenase, putative	3	K00128 aldehyde dehydrogenase (NAD+)	Glycolysis / Gluconeogenesis""Pentose and glucuronate interconversions""Ascorbate and aldarate metabolism"" Fatty acid metabolism""Valine, leucine and isoleucine degradation""Lysine degradation""Arginine and proline metabolism""Histidine metabolism""Tryptophan metabolism""beta-Alanine metabolism"" Glycerolipid metabolism"" Pyruvate metabolism"" Propanoate metabolism	0.104399	0.217809	No Chg
			ISCW020197-PA	pyruvate kinase, putative	4	K00873 pyruvate kinase	Glycolysis / Gluconeogenesis""Purine metabolism""Pyruvate metabolism""Adenine ribonucleotide biosynthesis, IMP => ADP,ATP""Guanine ribonucleotide biosynthesis IMP => GDP,GTP	No Chg	No Chg	2.68993
			ISCW011597-PA	saposin, putative	4	K12382 saposin	Lysosome	0.452785	2.19858	No Chg
			ISCW016170-PA	ribophorin, putative	3	K12666 oligosaccharyltransferase complex subunit alpha (ribophorin I)	N-Glycan biosynthesis""Protein processing in endoplasmic reticulum""Oligosaccharyltransferase	0.130865	No Chg	No Chg
			ISCW011988-PA	F0F1-type ATP synthase, alpha subunit, putative	9	K02132 F-type H+-transporting ATPase subunit alpha	Oxidative phosphorylation	0.243983	No Chg	No Chg
			ISCW012509-PA	F0F1-type ATP synthase, beta subunit, putative	10	K02133 F-type H+-transporting ATPase subunit beta	Oxidative phosphorylation	0.373269	0.420353	No Chg
			ISCW004822-PA	carbon-nitrogen hydrolase, putative	4	K08069 pantetheine hydrolase	Pantothenate and CoA biosynthesis	2.45063	No Chg	No Chg
			ISCW023506-PA	transaldolase, putative	2	K00616 transaldolase	Pentose phosphate pathway	0.381184	No Chg	0.452928
			ISCW010532-PA	alkyl hydroperoxide reductase, thiol specific antioxidant, putative	3	K13279 peroxiredoxin 1	Peroxisome	0.174538	No Chg	No Chg
			ISCW024111-PA	actin, putative	14	K05692 actin beta/gamma 1	Phagosome	0.265958	0.215903	No Chg
			ISCW003527-PA	alpha tubulin	9	K07374 tubulin alpha	Phagosome	0.232732	No Chg	No Chg
			ISCW017133-PA	beta tubulin	8	K07375 tubulin beta	Phagosome	0.191004	0.468882	0.483878
			ISCW007139-PA	20S proteasome, regulatory subunit alpha type PSMA7/PRE6, putative	2	K02731 20S proteasome subunit alpha 4	Proteasome	9.69844	8.49144	No Chg
			ISCW017754-PA	heat shock protein, putative	15	K09490 heat shock 70kDa protein 5	Protein export"" Protein processing in endoplasmic reticulum	0.293603	0.455431	No Chg
			ISCW016161-PA	protein disulfide isomerase, putative	9	K08056 protein disulfide isomerase family A, member 3	Protein processing in endoplasmic reticulum	No Chg	No Chg	2.23717
			ISCW012646-PA	hypoxia up-regulated protein, putative	3	K09486 hypoxia up-regulated 1	Protein processing in endoplasmic reticulum	No Chg	0.126799	3.99306
			ISCW022766-PA	tumor rejection antigen (gp96), putative	7	K09487 heat shock protein 90kDa beta	Protein processing in endoplasmic reticulum	No Chg	No Chg	3.33258
			ISCW010827-PA	protein disulfide isomerase, putative	9	K09580 protein disulfide-isomerase A1	Protein processing in endoplasmic reticulum	No Chg	No Chg	No Chg
			ISCW018425-PA	secreted protein, putative	4	K09586 endoplasmic reticulum protein 29	Protein processing in endoplasmic reticulum	2.02397	2.17793	No Chg
			ISCW012623-PA	lectin, putative	2	K10082 lectin, mannose-binding 2	Protein processing in endoplasmic reticulum	No Chg	No Chg	No Chg
			ISCW014265-PA	Hsp90 protein, putative	18	K04079 molecular chaperone HtpG	Protein processing in endoplasmic reticulum"" Progesterone-mediated oocyte maturation	0.192109	0.319286	No Chg
			ISCW008184-PA	calreticulin, putative	7	K08057 calreticulin	Protein processing in endoplasmic reticulum""Phagosome	0.492222	No Chg	0.36175
			ISCW008173-PA	ribosomal protein L15, putative	2	K02877 large subunit ribosomal protein L15e	Ribosome	0.21667	No Chg	No Chg
			ISCW010039-PA	ribosomal protein L18A, putative	2	K02882 large subunit ribosomal protein L18Ae	Ribosome	0.472576	No Chg	No Chg
			ISCW024803-PA	60S ribosomal protein L23, putative	3	K02893 large subunit ribosomal protein L23Ae	Ribosome	No Chg	No Chg	No Chg
			ISCW005008-PA	60S ribosomal protein L27, putative	1	K02901 large subunit ribosomal protein L27e	Ribosome	0.3975	8.72342	0.1
			ISCW017219-PA	ribosomal protein L35, putative	2	K02918 large subunit ribosomal protein L35e	Ribosome	0.105127	No Chg	No Chg
			ISCW023076-PA	ribosomal protein L3, putative	2	K02925 large subunit ribosomal protein L3e	Ribosome	0.346293	No Chg	0.1
			ISCW007478-PA	ribosomal protein L4, putative	3	K02930 large subunit ribosomal protein L4e	Ribosome	0.240105	0.465279	10.0745
			ISCW016112-PA	ribosomal protein L6, putative	6	K02934 large subunit ribosomal protein L6e	Ribosome	No Chg	0.473049	No Chg
			ISCW004030-PA	ribosomal protein, putative	4	K02937 large subunit ribosomal protein L7e	Ribosome	No Chg	No Chg	9.77329
			ISCW007303-PA	60S acidic ribosomal protein P0, putative	7	K02941 large subunit ribosomal protein LP0	Ribosome	No Chg	No Chg	No Chg
			ISCW023883-PA	40S ribosomal protein S10, putative	3	K02947 small subunit ribosomal protein S10e	Ribosome	No Chg	2.43173	No Chg
			ISCW008069-PA	40S ribosomal protein S3A, putative	3	K02984 small subunit ribosomal protein S3Ae	Ribosome	0.2031	0.123995	0.1
			ISCW012831-PA	40S ribosomal protein S5, putative	1	K02989 small subunit ribosomal protein S5e	Ribosome	0.0790925	0.119567	No Chg
			ISCW023083-PA	40S ribosomal protein S9, putative	4	K02997 small subunit ribosomal protein S9e	Ribosome	No Chg	0.277654	0.217352
			ISCW017824-PA	chaperonin subunit, putative	11	K04077 chaperonin GroEL	RNA degradation	No Chg	0.396035	No Chg
			ISCW020299-PA	translation elongation factor EF-1 alpha/Tu, putative	11	K03231 elongation factor 1-alpha	RNA transport	0.327752	0.357811	No Chg
			ISCW015864-PA	translation initiation factor 4F, helicase subunit, putative	4	K03257 translation initiation factor 4A	RNA transport""eIF4F complex	No Chg	2.64127	No Chg
			ISCW001860-PA	THO complex subunit, putative	4	K12881 THO complex subunit 4	RNA transport""mRNA surveillance pathway""Spliceosome""TREX complex""Exon junction complex (EJC)	0.294939	8.46577	No Chg
			ISCW011438-PA	RNA-binding protein musashi, putative	6	K12741 heterogeneous nuclear ribonucleoprotein A1/A3	Spliceosome	0.323864	0.335888	5.20637
			ISCW001255-PA	IFN-response element binding factor, putative	2	K12891 splicing factor, arginine/serine-rich 2	Spliceosome	No Chg	No Chg	No Chg
			ISCW006562-PA	RSZp22 protein, putative	2	K12896 splicing factor, arginine/serine-rich 7	Spliceosome	0.125648	0.136362	No Chg
			ISCW017456-PA	heat shock protein, putative	18	K03283 heat shock 70kDa protein 1/8	Spliceosome""Protein processing in endoplasmic reticulum"" Endocytosis	No Chg	No Chg	0.313109
			ISCW020196-PA	fumarylacetoacetase, putative	2	K01555 fumarylacetoacetase	Tyrosine metabolism	9.58611	10.6753	No Chg
			ISCW019123-PA	ubiquitin-activating enzyme E1, putative	4	K03178 ubiquitin-activating enzyme E1	Ubiquitin mediated proteolysis	No Chg	4.8498	No Chg
			ISCW013691-PA	calcyclin-binding protein CacyBP, putative	2	K04507 calcyclin binding protein	Wnt signaling pathway	0.43837	2.20443	0.124732
			ISCW004620-PA	elongation factor 1-beta	2	K03232 elongation factor 1-beta		No Chg	No Chg	No Chg
			ISCW015665-PA	DEAD box ATP-dependent RNA helicase, putative	1
			ISCW019625-PA	hypothetical protein	1
			ISCW006646-PA	zinc finger protein, putative	1
			ISCW012920-PA	glucosidase II, putative	1	K05546 alpha 1,3-glucosidase	N-Glycan biosynthesis""Protein processing in endoplasmic reticulum
			ISCW015592-PA	calmodulin, putative	1	K02183 calmodulin	Phosphatidylinositol signaling system
			ISCW022213-PA	breakpoint cluster region protein, putative	1			9.90279
			ISCW023399-PA	conserved hypothetical protein	1			0.153523
			ISCW019164-PA	heat shock protein 70 (HSP70), putative	1			11.5015
			ISCW003761-PA	hypothetical protein	1			0.1
			ISCW004697-PA	hypothetical protein	1			9.88611
			ISCW013117-PA	hypothetical protein	1			9.88611
			ISCW022925-PA	phosphoenolpyruvate carboxylase kinase, putative	1			11.5015
			ISCW011739-PA	prostate-specific transglutaminase, putative	1			11.5015
			ISCW000706-PA	SET and MYND domain-containing protein (SMYD), putative	1			No Chg
			ISCW007336-PA	sulfotransferase, putative	1			0.149287
			ISCW001427-PA	E1b-55kD-associated protein, putative	1	K15047 heterogeneous nuclear ribonucleoprotein U-like protein 1		0.120877
			ISCW002493-PA	cyclophilin B precursor, putative	1	K03768 peptidyl-prolyl cis-trans isomerase B (cyclophilin B)		10.0147
			ISCW003221-PA	pterin-4-alpha-carbinolamine dehydratase, putative	1	K01724 4a-hydroxytetrahydrobiopterin dehydratase		9.73726
			ISCW008740-PA	cytochrome C, putative	1	K08738 cytochrome c		10.535
			ISCW009689-PA	heat shock protein 70 (HSP70)-interacting protein, putative	1	K09560 suppressor of tumorigenicity protein 13		8.62426
			ISCW010950-PA	ng,ng-dimethylarginine dimethylaminohydrolase, putative	1	K01482 dimethylargininase		11.5015
			ISCW020327-PA	conserved hypothetical protein	1	K11374 elongator complex protein 2		0.1
			ISCW021388-PA	serine/threonine protein kinase, putative	1	K04412 serine/threonine kinase 3		9.09141
			ISCW005185-PA	hypothetical protein	1	K10484 structure-specific endonuclease subunit SLX4 (BTB/POZ domain-containing protein 12)	Fanconi anemia pathway	No Chg
			ISCW015573-PA	RNA recognition motif-containing protein	1	K14407 cleavage stimulation factor subunit 2	mRNA surveillance pathway	9.53345
			ISCW013810-PA	ribosomal protein L19, putative	1	K02885 large subunit ribosomal protein L19e	Ribosome	No Chg
			ISCW010723-PA	ribosomal protein, putative	1	K02943 large subunit ribosomal protein LP2	Ribosome	9.10131
			ISCW000412-PA	synaptobrevin 1-2, putative	1	K08517 vesicle transport protein SEC22	SNARE interactions in vesicular transport""Phagosome	No Chg
			ISCW006743-PA	ubiquitin protein ligase, putative	1	K10580 ubiquitin-conjugating enzyme E2 N	Ubiquitin mediated proteolysis	9.6386
			ISCW001151-PA	acireductone dioxygenase, putative	1				10.6482
			ISCW002513-PA	alpha-crystallin B chain, putative	1				0.244026
			ISCW000607-PA	conserved hypothetical protein	1				0.268687
			ISCW011861-PA	conserved hypothetical protein	1				0.1
			ISCW008890-PA	heat shock protein 70 (HSP70)-interacting protein, putative	1				0.142387
			ISCW002273-PA	hypothetical protein	1				0.339942
			ISCW003520-PA	hypothetical protein	1				0.100774
			ISCW010712-PA	hypothetical protein	1				9.16232
			ISCW012549-PA	hypothetical protein	1				0.100774
			ISCW010241-PA	Misexpression suppressor of KSR, putative	1				3.39568
			ISCW020986-PA	mll protein, putative	1				4.12671
			ISCW014710-PA	phosphatidylethanolamine-binding protein, putative	1				12.6006
			ISCW008949-PA	proteasome, subunit beta, putative	1				0.151543
			ISCW017252-PA	reticulocalbin, putative	1				0.1
			ISCW019640-PA	transmembrane protein, putative	1				10.2797
			ISCW011023-PA	WD-repeat protein, putative	1				10.7078
			ISCW006712-PA	TNF-alpha induced protein B12, putative	1	K15074 BTB/POZ domain-containing adapter for CUL3-mediated RhoA degradation protein			9.11374
			ISCW014575-PA	electron transfer flavoprotein, alpha subunit, putative	1	K03522 electron transfer flavoprotein alpha subunit			0.1
			ISCW015757-PA	zinc finger protein, putative	1	K07876 Ras-related protein Rab-35			9.92908
			ISCW018081-PA	actin-binding protein ipp, putative	1	K13956 actin-binding protein IPP			10.0951
			ISCW020850-PA	prefoldin, putative	1	K09548 prefoldin subunit 1			No Chg
			ISCW023257-PA	sirtuin type, putative	1	K11412 NAD-dependent deacetylase sirtuin 2			0.140197
			ISCW009943-PA	laminin gamma-1 chain, putative	1	K05635 laminin, gamma 1	ECM-receptor interaction		10.0822
			ISCW016585-PA	manganese superoxide dismutase, putative	1	K04564 superoxide dismutase, Fe-Mn family	Peroxisome		0.191641
			ISCW017299-PA	signal recognition particle protein, putative	1	K03108 signal recognition particle subunit SRP72	Protein export		12.214
			ISCW015602-PA	60S ribosomal protein L10A, putative	2	K02865 large subunit ribosomal protein L10Ae	Ribosome		0.16416
			ISCW021749-PA	ribosomal protein L27A, putative	1	K02900 large subunit ribosomal protein L27Ae	Ribosome		8.75829
			ISCW005364-PA	conserved hypothetical protein	1	K12160 small ubiquitin-related modifier	RNA transport		0.1
			ISCW009360-PA	splicing factor 3B subunit, putative	1	K12828 splicing factor 3B subunit 1	Spliceosome		0.327158
			ISCW019664-PA	U2 snRNP splicing factor, small subunit, putative	1	K12836 splicing factor U2AF 35 kDa subunit	Spliceosome		10.7079
			ISCW024910-PA	heat shock protein, putative	1	K03283 heat shock 70kDa protein 1/8	Spliceosome""Protein processing in endoplasmic reticulum""Endocytosis		9.11374
			ISCW015565-PA	40S ribosomal protein S18, putative	1			0.162122	No Chg
			ISCW012954-PA	40S ribosomal protein S27, putative	1			No Chg	No Chg
			ISCW002306-PA	acid methyltransferase, putative	1			10.0376	10.8805
			ISCW002531-PA	alternative splicing factor ASF/SF2, putative	1			0.0193011	0.0430671
			ISCW000263-PA	anhydro-N-acetylmuramic acid kinase, putative	2			2.38381	No Chg
			ISCW004958-PA	ankyrin repeat-containing protein	1			10.0376	10.8805
			ISCW006484-PA	arginine-rich protein, putative	1			0.1	0.100802
			ISCW017136-PA	beta tubulin	1			0.235824	1.72117
			ISCW007794-PA	beta-ketoacyl synthase, putative	1			10.0308	8.59139
			ISCW012121-PA	beta-ketoacyl-ACP reductase, putative	1			No Chg	No Chg
			ISCW016777-PA	Cdc42 protein, putative	1			0.122339	0.204446
			ISCW019185-PA	cell adhesion molecule, putative	1			0.130228	No Chg
			ISCW015666-PA	cellular nucleic acid binding protein, putative	1			0.292167	0.158031
			ISCW000122-PA	conserved hypothetical protein	1			0.1	0.1
			ISCW001851-PA	conserved hypothetical protein	1			0.1	0.12242
			ISCW003431-PA	conserved hypothetical protein	2			0.152463	1.42057
			ISCW004355-PA	conserved hypothetical protein	1			No Chg	0.163665
			ISCW007832-PA	conserved hypothetical protein	1			0.1	0.1
			ISCW009407-PA	conserved hypothetical protein	1			No Chg	No Chg
			ISCW013286-PA	conserved hypothetical protein	1			8.13001	9.87542
			ISCW019381-PA	conserved hypothetical protein	1			0.1	No Chg
			ISCW019741-PA	conserved hypothetical protein	2			0.0616537	0.0549057
			ISCW022875-PA	conserved hypothetical protein	3			0.268434	0.290067
			ISCW023315-PA	conserved hypothetical protein	1			0.118525	0.1
			ISCW008433-PA	dehydrogenase, putative	1			0.1	0.1
			ISCW000865-PA	EF hand domain-containing protein, putative	1			0.102792	0.146252
			ISCW011734-PA	flavonol reductase/cinnamoyl-CoA reductase, putative	6			0.157935	0.241368
			ISCW022311-PA	furrowed, putative	1			10.3849	10.319
			ISCW020361-PA	glutamine synthetase 1, putative	1			0.116308	0.10975
			ISCW006071-PA	GTP binding protein Rab-1A	2			0.1	0.367475
			ISCW000190-PA	heat shock protein, putative	1			0.1	0.1
			ISCW009157-PA	heat shock protein, putative	2			0.167828	0.422459
			ISCW011795-PA	helix-loop-helix transcription factor, putative	1			No Chg	0.1
			ISCW011972-PA	histidine triad (hit) protein, putative	1			9.37159	10.1884
			ISCW000276-PA	hypothetical protein	1			0.128929	0.1
			ISCW002421-PA	hypothetical protein	1			No Chg	No Chg
			ISCW002602-PA	hypothetical protein	1			0.224748	0.1
			ISCW004566-PA	hypothetical protein	1			No Chg	No Chg
			ISCW006298-PA	hypothetical protein	2			0.146108	No Chg
			ISCW007583-PA	hypothetical protein	1			No Chg	0.243493
			ISCW007704-PA	hypothetical protein	1			0.150234	0.1
			ISCW007801-PA	hypothetical protein	1			0.122895	0.129638
			ISCW008773-PA	hypothetical protein	1			0.0208078	0.1
			ISCW008823-PA	hypothetical protein	1			10.7324	8.90898
			ISCW009032-PA	hypothetical protein	1			0.0565187	0.178647
			ISCW013939-PA	hypothetical protein	1			0.1	No Chg
			ISCW014417-PA	hypothetical protein	3			2.06186	2.2272
			ISCW014447-PA	hypothetical protein	1			0.1	2.31013
			ISCW015951-PA	hypothetical protein	1			0.1	0.20745
			ISCW018879-PA	hypothetical protein	1			0.1	0.1
			ISCW019295-PA	hypothetical protein	1			0.283139	0.314037
			ISCW023296-PA	hypothetical protein	3			0.348783	0.374738
			ISCW023909-PA	hypothetical protein	1			0.1	0.155913
			ISCW024437-PA	hypothetical protein	1			No Chg	No Chg
			ISCW001780-PA	leucine aminopeptidase, putative	1			10.3664	9.79635
			ISCW007116-PA	limbic system-associated membrane protein, putative	1			0.1	No Chg
			ISCW004288-PA	MACRO domain-containing protein, putative	1			No Chg	No Chg
			ISCW001521-PA	membrane protein, putative	1			10.7684	11.2656
			ISCW006748-PA	neurofilament medium polypeptide, putative	4			0.10799	4.26412
			ISCW005049-PA	nono protein, putative	1			0.1	0.1
			ISCW006172-PA	phosphoprotein/coiled-coil protein, putative	1			0.1	0.103403
			ISCW021457-PA	prohibitin, putative	1			0.19148	0.208923
			ISCW012814-PA	proteasome subunit alpha type, putative	1			0.111686	0.111893
			ISCW010157-PA	protein involved in membrane traffic, putative	1			No Chg	0.1
			ISCW021858-PA	radixin, moesin, putative	4			0.130687	0.334332
			ISCW004407-PA	reticulon/nogo, putative	4			0.48586	No Chg
			ISCW001285-PA	ribosomal protein L34, putative	1			0.1	0.1
			ISCW015020-PA	RNA binding motif-containing protein, putative	9			0.284	0.317197
			ISCW016044-PA	RNA polymerase II second largest subunit (RPB2), putative	1			No Chg	No Chg
			ISCW021980-PA	RNA-binding protein precursor, putative	2			0.117668	0.100553
			ISCW006831-PA	RNA-binding protein, putative	2			No Chg	No Chg
			ISCW008767-PA	Scaffold attachment factor B1, putative	1			0.1	0.173374
			ISCW007070-PA	secretory protein, putative	2			0.1	No Chg
			ISCW017020-PA	short chain alcohol dehydrogenase, putative	1			0.1	0.1
			ISCW016888-PA	single-stranded DNA binding protein P9, putative	1			0.267184	0.289445
			ISCW024922-PA	small heat shock protein, putative	1			2.25651	0.445033
			ISCW000499-PA	sorting nexin, putative	1			0.268498	0.1
			ISCW007267-PA	SOX transcription factor, putative	1			No Chg	No Chg
			ISCW016709-PA	tetratricopeptide repeat protein, tpr, putative	1			0.1	No Chg
			ISCW003347-PA	tip120, putative	1			No Chg	No Chg
			ISCW024497-PA	Translationally-controlled tumor protein homolog (TCTP)	1			No Chg	No Chg
			ISCW008202-PA	tropomyosin invertebrate, putative	1			0.1	0.139884
			ISCW021859-PA	VEGF183 protein, putative	1			0.237277	0.1
			ISCW000538-PA	vasa intronic protein, putative	1	K13199 plasminogen activator inhibitor 1 RNA-binding protein		0.202753	0.1
			ISCW000781-PA	voltage-dependent anion-selective channel, putative	2	K15040 voltage-dependent anion channel protein 2		No Chg	No Chg
			ISCW001345-PA	acyl-CoA synthetase, putative	1	K00666 fatty-acyl-CoA synthase		0.182373	No Chg
			ISCW002538-PA	Na+/K+ ATPase, alpha subunit, putative	1	K01539 sodium/potassium-transporting ATPase subunit alpha		0.197209	No Chg
			ISCW003366-PA	stathmin, putative	1	K04381 stathmin		No Chg	No Chg
			ISCW003606-PA	dynein light chain	2	K10418 dynein light chain LC8-type		No Chg	No Chg
			ISCW004478-PA	histone 2A	2	K11251 histone H2A		2.34418	0.0603166
			ISCW006407-PA	programmed cell death, putative	1	K06875 programmed cell death protein 5		0.1	0.1
			ISCW007627-PA	chaperonin complex component, TCP-1 delta subunit, putative	1	K09496 T-complex protein 1 subunit delta		No Chg	0.150999
			ISCW008629-PA	aminopeptidase, putative	1	K08776 puromycin-sensitive aminopeptidase		0.1	0.1
			ISCW008769-PA	cyclin T-dependent kinase CDK9, putative	1	K08827 serine/threonine-protein kinase PRP4		0.1	No Chg
			ISCW011192-PA	conserved hypothetical protein	1	K14790 nucleolar protein 9		10.18	10.2327
			ISCW011314-PA	peptidyl-prolyl cis-trans isomerase, putative	2	K03768 peptidyl-prolyl cis-trans isomerase B (cyclophilin B)		0.1	0.1
			ISCW012705-PA	myosin, putative	1	K10356 myosin I		0.12257	0.109677
			ISCW015321-PA	thioredoxin-dependent peroxide reductase	2	K03386 peroxiredoxin (alkyl hydroperoxide reductase subunit C)		10.5709	No Chg
			ISCW017659-PA	eIF2-interacting protein ABC50, putative	1	K06158 ATP-binding cassette, subfamily F, member 3		No Chg	0.0341426
			ISCW017832-PA	fork head domain protein, putative	1	K09403 forkhead box protein J2/3		0.1	2.0084
			ISCW019646-PA	hypothetical protein	2	K06095 multiple PDZ domain protein		0.466937	0.164306
			ISCW020554-PA	RNA-binding protein, putative	1	K11294 nucleolin		No Chg	No Chg
			ISCW021585-PA	spectrin beta chain, putative	5	K06115 spectrin beta		No Chg	No Chg
			ISCW021753-PA	ADP/ATP translocase, putative	2	K05863 solute carrier family 25 (mitochondrial adenine nucleotide translocator), member 4/5/6/31		0.1	0.479587
			ISCW023338-PA	talin, putative	2	K06271 talin		3.55902	3.14298
			ISCW023397-PA	chaperonin complex component, TCP-1 eta subunit, putative	1	K09499 T-complex protein 1 subunit eta		0.102449	0.198888
			ISCW023498-PA	sulfate/bicarbonate/oxalate exchanger SAT-1, putative	1	K14453 solute carrier family 26, other		0.0106439	No Chg
			ISCW023555-PA	conserved hypothetical protein	1	K10392 kinesin family member 1/13/14		No Chg	No Chg
			ISCW000393-PA	glutamate dehydrogenase, putative	1	K00261 glutamate dehydrogenase (NAD(P)+)	Alanine, aspartate and glutamate metabolism""Arginine and proline metabolism""D-Glutamine and D-glutamate metabolism	10.1764	9.78532
			ISCW014576-PA	asparaginyl-tRNA synthetase, putative	1	K01893 asparaginyl-tRNA synthetase	Aminoacyl-tRNA biosynthesis	11.0412	No Chg
			ISCW018044-PA	lysyl-tRNA synthetase, putative	1	K04567 lysyl-tRNA synthetase, class II	Aminoacyl-tRNA biosynthesis	11.1277	9.02921
			ISCW020593-PA	fumarase, putative	1	K01679 fumarate hydratase, class II	Citrate cycle (TCA cycle)	0.150394	0.0295641
			ISCW009586-PA	citrate synthase, putative	5	K01647 citrate synthase	Citrate cycle (TCA cycle)"" Glyoxylate and dicarboxylate metabolism""Citrate cycle, first carbon oxidation, oxaloacetate => 2-oxoglutarate	0.203709	No Chg
			ISCW003528-PA	malate dehydrogenase, putative	4	K00026 malate dehydrogenase	Citrate cycle (TCA cycle)""Pyruvate metabolism""Glyoxylate and dicarboxylate metabolism	3.25798	No Chg
			ISCW022029-PA	DNA polymerase delta processivity factor, putative	4	K04802 proliferating cell nuclear antigen	DNA replication""Base excision repair""Nucleotide excision repair""Mismatch repair	No Chg	No Chg
			ISCW001274-PA	medium-chain acyl-CoA dehydrogenase, putative	1	K00249 acyl-CoA dehydrogenase	Fatty acid metabolism"Valine, leucine and isoleucine degradation""beta-Alanine metabolism""Propanoate metabolism""Malonate semialdehyde pathway, propanoyl-CoA => Acetyl-CoA""beta-Oxidation	0.128055	0.0427445
			ISCW016117-PA	acetyl-CoA acetyltransferase, putative	2	K00626 acetyl-CoA C-acetyltransferase	Fatty acid metabolismSynthesis and degradation of ketone bodiesValine, leucine and isoleucine degradationLysine degradationTryptophan metabolismPyruvate metabolismGlyoxylate and dicarboxylate metabolismPropanoate metabolismButanoate metabolismTerpenoid backbone biosynthesis	3.26208	8.59139
			ISCW003100-PA	conserved hypothetical protein	2	K01255 leucyl aminopeptidase	Glutathione metabolism	10.4728	9.57712
			ISCW004779-PA	1-acyl-sn-glycerol-3-phosphate acyltransferase zeta, putative	1	K13506 glycerol-3-phosphate O-acyltransferase 3/4	Glycerolipid metabolism""Glycerophospholipid metabolism	No Chg	No Chg
			ISCW019963-PA	glyoxylate/hydroxypyruvate reductase, putative	2	K00049 glyoxylate/hydroxypyruvate reductase	Glycine, serine and threonine metabolism""Pyruvate metabolism""Glyoxylate and dicarboxylate metabolism	No Chg	No Chg
			ISCW018700-PA	glyceraldehyde 3-phosphate dehydrogenase, putative	4	K00134 glyceraldehyde 3-phosphate dehydrogenase	Glycolysis / Gluconeogenesis	0.385605	No Chg
			ISCW011371-PA	fructose 1,6-bisphosphate aldolase, putative	4	K01623 fructose-bisphosphate aldolase, class I	Glycolysis / Gluconeogenesis""Pentose phosphate pathway""Fructose and mannose metabolism	0.192598	0.425759
			ISCW004397-PA	tetraspanin, putative	4	K06497 CD63 antigen	Lysosome	0.375498	0.0940093
			ISCW019441-PA	clathrin heavy chain, putative	2	K04646 clathrin heavy chain	Lysosome""Endocytosis	No Chg	No Chg
			ISCW013073-PA	meiotic cell division protein Pelota/DOM34, putative	1	K06965 protein pelota	mRNA surveillance pathway	0.130228	No Chg
			ISCW014573-PA	splicing factor, putative	2	K14411 RNA-binding protein Musashi	mRNA surveillance pathway	0.464923	No Chg
			ISCW004710-PA	protein Mo25, putative	1	K08272 calcium binding protein 39	mTOR signaling pathway	11.7352	9.7944
			ISCW007830-PA	histone deacetylase 1, 2 ,3, putative	1	K06067 histone deacetylase 1/2	Notch signaling pathway	0.1	0.1
			ISCW011548-PA	nucleotide excision repair factor NEF2, RAD23 component, putative	1	K10839 UV excision repair protein RAD23	Nucleotide excision repair""Protein processing in endoplasmic reticulum	0.162222	0.182378
			ISCW007522-PA	hexosaminidase domain-containing protein, putative	1	K14459 hexosaminidase	Other glycan degradation	0.1	0.145165
			ISCW018418-PA	ATP synthase H+ transporting, F1 complex, delta subunit precursor, putative	1	K02134 F-type H+-transporting ATPase subunit delta	Oxidative phosphorylation	0.1	0.1
			ISCW016217-PA	ATP synthase D chain, putative	1	K02138 F-type H+-transporting ATPase subunit d	Oxidative phosphorylation	0.221608	No Chg
			ISCW002128-PA	aldo-keto reductase, putative	3	K00011 aldehyde reductase	Pentose and glucuronate interconversions""Fructose and mannose metabolism""Galactose metabolism"" Glycerolipid metabolism""Pyruvate metabolism	0.108899	No Chg
			ISCW010978-PA	20S proteasome, regulatory subunit alpha type PSMA1/PRE5, putative	2	K02725 20S proteasome subunit alpha 6	Proteasome	No Chg	No Chg
			ISCW005463-PA	proteasome alpha subunit, putative	1	K02727 20S proteasome subunit alpha 7	Proteasome	0.248717	0.1
			ISCW006948-PA	20S proteasome, regulatory subunit beta, putative	1	K02735 20S proteasome subunit beta 3	Proteasome	0.19891	0.12807
			ISCW021692-PA	26S proteasome regulatory subunit rpn1, putative	1	K03028 26S proteasome regulatory subunit N1	Proteasome	0.1	0.194008
			ISCW018294-PA	ATPase, putative	1	K03062 26S proteasome regulatory subunit T2	Proteasome	0.1	0.1
			ISCW008339-PA	translocation protein SEC62, putative	1	K12275 translocation protein SEC62	Protein export"" Protein processing in endoplasmic reticulum	No Chg	No Chg
			ISCW006829-PA	ubiquilin 1,2, putative	2	K04523 ubiquilin	Protein processing in endoplasmic reticulum	0.12056	9.39944
			ISCW013550-PA	protein kinase C substrate, 80 KD protein, heavy chain, putative	1	K08288 protein kinase C substrate 80K-H	Protein processing in endoplasmic reticulum	0.106791	0.1
			ISCW002080-PA	protein disulfide isomerase 1, putative	5	K09584 protein disulfide-isomerase A6	Protein processing in endoplasmic reticulum	0.480698	2.10312
			ISCW009068-PA	membrane protein, putative	1	K11519 Derlin-1	Protein processing in endoplasmic reticulum	No Chg	0.10322
			ISCW003709-PA	calnexin, putative	1	K08054 calnexin	Protein processing in endoplasmic reticulum"" Phagosome	8.95083	10.739
			ISCW012704-PA	signal sequence receptor beta	1	K13250 translocon-associated protein subunit beta	Protein processing in endoplasmic reticulum""Translocon-associated protein (TRAP) complex	No Chg	No Chg
			ISCW023074-PA	nucleoside diphosphate kinase, putative	3	K00940 nucleoside-diphosphate kinase	Purine metabolism""Pyrimidine metabolism""Adenine ribonucleotide biosynthesis, IMP => ADP,ATP"" Guanine ribonucleotide biosynthesis IMP => GDP,GTP""Pyrimidine ribonucleotide biosynthesis, UMP => UDP/UTP,CDP/CTP	0.212998	1.63305
			ISCW012446-PA	cytidylate kinase, putative	2	K13800 UMP-CMP kinase	Pyrimidine metabolism	2.34985	3.52719
			ISCW017543-PA	60S ribosomal protein L10, putative	2	K02866 large subunit ribosomal protein L10e	Ribosome	No Chg	0.191127
			ISCW004058-PA	ribosomal protein L12, putative	2	K02870 large subunit ribosomal protein L12e	Ribosome	No Chg	No Chg
			ISCW019130-PA	ribosomal protein L13A, putative	2	K02872 large subunit ribosomal protein L13Ae	Ribosome	No Chg	0.399223
			ISCW000979-PA	60S ribosomal protein L14, putative	1	K02875 large subunit ribosomal protein L14e	Ribosome	0.153885	0.212689
			ISCW005425-PA	60S ribosomal protein L17	2	K02880 large subunit ribosomal protein L17e	Ribosome	10.7735	No Chg
			ISCW021924-PA	60S ribosomal protein L18	1	K02883 large subunit ribosomal protein L18e	Ribosome	0.334717	0.1
			ISCW024424-PA	60S ribosomal protein L35A, putative	1	K02917 large subunit ribosomal protein L35Ae	Ribosome	No Chg	0.197597
			ISCW017610-PA	60S ribosomal protein L5, putative	1	K02932 large subunit ribosomal protein L5e	Ribosome	No Chg	0.143045
			ISCW006538-PA	60S acidic ribosomal protein P1, putative	1	K02942 large subunit ribosomal protein LP1	Ribosome	0.147343	No Chg
			ISCW023299-PA	40S ribosomal protein S14, putative	1	K02955 small subunit ribosomal protein S14e	Ribosome	0.330172	No Chg
			ISCW001811-PA	ribosomal protein S17, putative	2	K02962 small subunit ribosomal protein S17e	Ribosome	No Chg	No Chg
			ISCW020743-PA	ribosomal protein S19, putative	1	K02966 small subunit ribosomal protein S19e	Ribosome	0.1	0.107104
			ISCW010752-PA	ribosomal protein S20, putative	1	K02969 small subunit ribosomal protein S20e	Ribosome	0.1	No Chg
			ISCW012634-PA	40S ribosomal protein S23, putative	2	K02973 small subunit ribosomal protein S23e	Ribosome	No Chg	0.138766
			ISCW000125-PA	40S ribosomal protein S27A, putative	3	K02977 small subunit ribosomal protein S27Ae	Ribosome	0.145824	0.349532
			ISCW003489-PA	40S ribosomal protein, putative	2	K02981 small subunit ribosomal protein S2e	Ribosome	0.12946	0.155016
			ISCW024787-PA	40S ribosomal protein S4	1	K02987 small subunit ribosomal protein S4e	Ribosome	No Chg	No Chg
			ISCW021828-PA	GTP-binding nuclear protein RAN1, putative	1	K07936 GTP-binding nuclear protein Ran	Ribosome biogenesis in eukaryotes""RNA transport	No Chg	No Chg
			ISCW023654-PA	GTP-binding nuclear protein RAN1, putative	1	K07936 GTP-binding nuclear protein Ran	Ribosome biogenesis in eukaryotes""RNA transport	0.1	0.230935
			ISCW017192-PA	Hsp70, putative	6	K04043 molecular chaperone DnaK	RNA degradation	0.474922	No Chg
			ISCW005076-PA	regulator of nonsense transcripts, putative	1	K14327 regulator of nonsense transcripts 2	RNA transport""mRNA surveillance pathway""Exon junction complex (EJC)	0.1	0.284771
			ISCW014211-PA	apoptosis-promoting RNA-binding protein TIA-1/TIAR, putative	2	K13126 polyadenylate-binding protein	RNA transport""mRNA surveillance pathway""RNA degradation	0.1	No Chg
			ISCW010314-PA	DEAD box ATP-dependent RNA helicase, putative	1	K12812 ATP-dependent RNA helicase UAP56/SUB2	RNA transport""mRNA surveillance pathway""Spliceosome""TREX complex""Exon junction complex (EJC)	No Chg	No Chg
			ISCW002946-PA	splicing factor u2af large subunit, putative	2	K12837 splicing factor U2AF 65 kDa subunit	Spliceosome	No Chg	No Chg
			ISCW021269-PA	u4/u6 small nuclear ribonucleoprotein, putative	1	K12843 U4/U6 small nuclear ribonucleoprotein PRP3	Spliceosome	2.2998	2.03311
			ISCW001209-PA	transformation upregulated nuclear protein, putative	1	K12886 heterogeneous nuclear ribonucleoprotein K	Spliceosome	0.149417	0.193266
			ISCW010309-PA	transformer-2 protein C, putative	1	K12897 transformer-2 protein	Spliceosome	10.8341	No Chg
			ISCW022293-PA	conserved hypothetical protein	1			9.69489		10.106
			ISCW010765-PA	hypothetical protein	1			10.3277		2.60131
			ISCW012547-PA	pygopus, putative	1			0.219416		No Chg
			ISCW017474-PA	zinc binding dehydrogenase, putative	1			8.42769		No Chg
			ISCW022880-PA	hypothetical protein	1	K09313 homeobox protein cut-like		9.37659		10.7984
			ISCW018040-PA	alanyl-tRNA synthetase, putative	1	K01872 alanyl-tRNA synthetase	Aminoacyl-tRNA biosynthesis	11.5724		9.23464
			ISCW023068-PA	60S ribosomal protein L13, putative	1	K02873 large subunit ribosomal protein L13e	Ribosome	10.4525		10.8627
			ISCW017347-PA	ribosomal protein L21, putative	1	K02889 large subunit ribosomal protein L21e	Ribosome	8.90837		0.109718
			ISCW014825-PA	60S ribosomal protein L7A, putative	1	K02936 large subunit ribosomal protein L7Ae	Ribosome	0.171847		No Chg
			ISCW024315-PA	40S ribosomal protein S6, putative	1	K02991 small subunit ribosomal protein S6e	Ribosome; mTOR signaling pathway	8.80404		No Chg
			ISCW006678-PA	conserved hypothetical protein	1				0.219385	9.90296
			ISCW004571-PA	cytochrome b5 domain-containing protein, putative	1				10.6724	No Chg
			ISCW015120-PA	GTP-binding protein, putative	1				0.154373	9.8208
			ISCW004473-PA	histone 2A, putative	1				No Chg	No Chg
			ISCW009421-PA	hypothetical protein	1				0.1	0.150242
			ISCW016612-PA	Ran-binding protein, putative	1				9.8611	No Chg
			ISCW023180-PA	splicing factor SC35, putative	1				9.03903	0.112639
			ISCW010766-PA	translation elongation factor, putative	2	K02358 elongation factor Tu			0.1	No Chg
			ISCW014488-PA	Der_and-312 phosphate carrier protein, putative	3	K15102 solute carrier family 25 (mitochondrial phosphate transporter), member 3			No Chg	0.487865
			ISCW018719-PA	glutamyl-tRNA synthetase, cytoplasmic, putative	1	K14163 bifunctional glutamyl/prolyl-tRNA synthetase	Porphyrin and chlorophyll metabolism"" Aminoacyl-tRNA biosynthesis		10.2199	No Chg
			ISCW009367-PA	B-cell receptor-associated protein, putative	1	K14009 B-cell receptor-associated protein 31	Protein processing in endoplasmic reticulum		0.1	No Chg
			ISCW009326-PA	protein transport protein sec23, putative	1	K14006 protein transport protein SEC23	Protein processing in endoplasmic reticulum""COPII complex		11.3966	No Chg
			ISCW012877-PA	ubiquitin-conjugating enzyme, putative	1	K10581 ubiquitin-conjugating enzyme E2 O	Ubiquitin mediated proteolysis		0.264864	0.209864
			ISCW006983-PA	alternative splicing factor SRp20/9G8, putative	2			No Chg	No Chg	No Chg
			ISCW020890-PA	hypothetical protein	2			0.00456422	0.000845748	No Chg
			ISCW004442-PA	splicing factor hnRNP-F, putative	2	K12898 heterogeneous nuclear ribonucleoprotein F/H		0.179109	0.265482	2.81535
			ISCW023355-PA	adenylate cyclase-associated protein, putative	1			No Chg
			ISCW011425-PA	heat shock protein, putative	1			No Chg
			ISCW009045-PA	hypothetical protein	1			No Chg
			ISCW009602-PA	hypothetical protein	1			No Chg
			ISCW016025-PA	tRNA synthetases class II, putative	1			0.45763
			ISCW006277-PA	RNA polymerase II proteinral transcription factor BTF3, putative	1	K01527 nascent polypeptide-associated complex subunit beta		No Chg
			ISCW023973-PA	protein arginine N-methyltransferase PRMT1, putative	1	K11434 protein arginine N-methyltransferase 1		No Chg
			ISCW017666-PA	enolase, putative	1	K01689 enolase	Glycolysis / Gluconeogenesis""RNA degradation	No Chg
			ISCW015484-PA	ribosomal protein S15Aa, putative	1	K02957 small subunit ribosomal protein S15Ae	Ribosome	No Chg
			ISCW019216-PA	box H/ACA snoRNP, putative	1	K12845 U4/U6 small nuclear ribonucleoprotein SNU13	Ribosome biogenesis in eukaryotes""Spliceosome	No Chg
			ISCW009365-PA	centrosome-associated protein CEP250, putative	1			No Chg	No Chg
			ISCW010405-PA	hypothetical protein	1			No Chg	No Chg
			ISCW021821-PA	hypothetical protein	1			0.0530829	0.0510205
			ISCW018189-PA	monocarboxylate transporter, putative	1			0.030537	0.0160185
			ISCW001498-PA	phosphoinositol 3-phosphate-binding protein, putative	1			4.70576	0.310686
			ISCW008027-PA	zinc finger protein, putative	1			0.00603477	0.000789846
			ISCW016118-PA	retinoblastoma-binding protein, putative	1	K10752 histone-binding protein RBBP4		No Chg	No Chg
			ISCW021887-PA	single-minded, putative	1	K09100 single-minded		No Chg	No Chg
			ISCW023837-PA	acid methyltransferase, putative	1	K10718 juvenile hormone acid methyltransferase		No Chg	No Chg
			ISCW005017-PA	ribophorin II, putative	1	K12667 oligosaccharyltransferase complex subunit delta (ribophorin II)	N-Glycan biosynthesis""Protein processing in endoplasmic reticulum""Oligosaccharyltransferase	No Chg	No Chg
			ISCW016837-PA	ribonucleotide reductase, beta subunit, putative	1	K10808 ribonucleoside-diphosphate reductase subunit M2	Purine metabolism""Pyrimidine metabolism""Glutathione metabolism	0.496436	0.460509
			ISCW008384-PA	two component histidine kinase, putative	1				No Chg	0.355243
			ISCW004899-PA	quinone oxidoreductase, putative	1	K00344 NADPH2:quinone reductase			No Chg	No Chg
			ISCW012934-PA	chaperonin complex component, TCP-1 theta subunit, putative	2	K09500 T-complex protein 1 subunit theta			No Chg	0.1
			ISCW006222-PA	proteasome beta2 subunit, putative	1	K02739 20S proteasome subunit beta 2	Proteasome		No Chg	No Chg
			ISCW009919-PA	ATP-citrate synthase, putative	1	K01648 ATP citrate (pro-S)-lyase	Citrate cycle (TCA cycle)		No Chg	No Chg
			ISCW007624-PA	malate dehydrogenase, putative	1	K00025 malate dehydrogenase	Citrate cycle (TCA cycle)""Pyruvate metabolism"" Glyoxylate and dicarboxylate metabolism		No Chg	No Chg
			ISCW020189-PA	aldehyde dehydrogenase, putative	1	K14085 aldehyde dehydrogenase family 7 member A1	Glycolysis / Gluconeogenesis""Ascorbate and aldarate metabolism""Fatty acid metabolism""Glycine, serine and threonine metabolism"" Valine, leucine and isoleucine degradation""Lysine biosynthesis""Lysine degradation""Arginine and proline metabolism""Histidine metabolism"" Tryptophan metabolism""beta-Alanine metabolism""Glycerolipid metabolism""Pyruvate metabolism""Propanoate metabolism""GABA biosy…		No Chg	No Chg
			ISCW000476-PA	ribosomal protein L11, putative	1	K02868 large subunit ribosomal protein L11e	Ribosome		No Chg	No Chg
			ISCW015393-PA	ribosomal protein S8, putative	3	K02995 small subunit ribosomal protein S8e	Ribosome		No Chg	No Chg
			ISCW018892-PA	H/ACA ribonucleoprotein complex protein, putative	1	K11130 H/ACA ribonucleoprotein complex subunit 3	Ribosome biogenesis in eukaryotes""H/ACA ribonucleoprotein complex		0.0190012	9.55337
			ISCW021497-PA	alpha chimerin, putative	1			No Chg		No Chg
			ISCW008709-PA	chaperonin complex component, TCP-1 delta subunit, putative	1			No Chg		No Chg
			ISCW013993-PA	small nuclear ribonucleoprotein E, putative	1	K11097 small nuclear ribonucleoprotein E	Spliceosome	0.367061		9.02778
			ISCW015373-PA	29 kDa ribonucleoprotein B, putative	1				No Chg
			ISCW002122-PA	chloride channel, putative	1				No Chg
			ISCW010173-PA	circadian locomoter output cycles kaput protein, putative	1				5.19526
			ISCW000028-PA	conserved hypothetical protein	1				No Chg
			ISCW012874-PA	conserved hypothetical protein	1				11.0261
			ISCW017015-PA	conserved hypothetical protein	1				No Chg
			ISCW008893-PA	extended synaptotagmin-2, putative	1				No Chg
			ISCW000713-PA	hypothetical protein	1				2.28441
			ISCW001903-PA	hypothetical protein	1				0.219385
			ISCW003181-PA	hypothetical protein	1				No Chg
			ISCW017573-PA	hypothetical protein	1				No Chg
			ISCW021590-PA	hypothetical protein	1				No Chg
			ISCW013746-PA	ixoderin precursor, putative	1				0.368427
			ISCW020507-PA	Lrriq2 protein, putative	1				No Chg
			ISCW018528-PA	steroid membrane receptor Hpr6.6/25-Dx, putative	1				No Chg
			ISCW012382-PA	superoxide dismutase Cu-Zn, putative	1				No Chg
			ISCW014194-PA	transmembrane protein, putative	1				No Chg
			ISCW020449-PA	transposase, putative	1				0.228738
			ISCW013767-PA	thioredoxin peroxidase, putative	1	K03386 peroxiredoxin (alkyl hydroperoxide reductase subunit C)			2.06383
			ISCW018880-PA	polycomb protein SCMH1, putative	1	K11461 polycomb protein SCMH1			0.017514
			ISCW019100-PA	DEAD box ATP-dependent RNA helicase, putative	1	K11594 ATP-dependent RNA helicase			3.10942
			ISCW023354-PA	DNA replication licensing factor, putative	1	K02541 minichromosome maintenance protein 3	DNA replication		No Chg
			ISCW000951-PA	NADH dehydrogenase	1	K03948 NADH dehydrogenase (ubiquinone) 1 alpha subcomplex 4	Oxidative phosphorylation		3.87756
			ISCW015486-PA	paramyosin, putative	1	K06638 mitotic spindle assembly checkpoint protein MAD1	Progesterone-mediated oocyte maturation		0.282916
			ISCW008741-PA	26S proteasome regulatory complex, ATPase RPT6, putative	1	K03066 26S proteasome regulatory subunit T6	Proteasome		No Chg
			ISCW013399-PA	DEAD box ATP-dependent RNA helicase, putative	1	K13025 ATP-dependent RNA helicase	RNA transport""mRNA surveillance pathway"" Spliceosome""Exon junction complex (EJC)		No Chg
			ISCW008104-PA	small nuclear ribonucleoprotein G, putative	1	K11099 small nuclear ribonucleoprotein G	Spliceosome		9.22729
			ISCW010835-PA	splicing factor 3A, putative	1	K12827 splicing factor 3A subunit 3	Spliceosome		No Chg
			ISCW018551-PA	ubiquitin protein ligase	1	K06689 ubiquitin-conjugating enzyme E2 D/E	Ubiquitin mediated proteolysis""Protein processing in endoplasmic reticulum		No Chg
			ISCW001988-PA	ABC transporter, putative	1					10.6766
			ISCW022876-PA	ca(2+)/calmodulin-dependent protein kinase phosphatase, putative	1					No Chg
			ISCW009790-PA	conserved hypothetical protein	1					3.42064
			ISCW013712-PA	conserved hypothetical protein	1					No Chg
			ISCW018379-PA	gastric mucin, putative	1					9.83204
			ISCW005768-PA	hypothetical protein	1					9.90296
			ISCW006176-PA	hypothetical protein	1					No Chg
			ISCW012389-PA	hypothetical protein	1					No Chg
			ISCW017435-PA	hypothetical protein	1					9.90296
			ISCW018385-PA	hypothetical protein	1					No Chg
			ISCW001788-PA	prohibitin, putative	1					No Chg
			ISCW005414-PA	signal recognition particle receptor, putative	1					No Chg
			ISCW001616-PA	solute carrier, putative	1					10.0888
			ISCW007897-PA	Whdc1 protein, putative	1					11.0152
			ISCW010362-PA	zinc finger protein, putative	1					No Chg
			ISCW005016-PA	nucleosome assembly protein NAP-1, putative	1	K11279 nucleosome assembly protein 1-like 1				10.3609
			ISCW020373-PA	translation initiation factor 5A	1	K03263 translation initiation factor 5A				No Chg
			ISCW022151-PA	conserved hypothetical protein	1	K04600 cadherin EGF LAG seven-pass G-type receptor 1 (flamingo)				9.5497
			ISCW024783-PA	guanine nucleotide-binding protein, putative	1	K14753 guanine nucleotide-binding protein subunit beta-2-like 1 protein				2.63776
			ISCW017361-PA	40S ribosomal protein S12, putative	1	K02951 small subunit ribosomal protein S12e	Ribosome			No Chg
			ISCW004116-PA	isocitrate dehydrogenase, putative	1	K00030 isocitrate dehydrogenase (NAD+)	Citrate cycle (TCA cycle)""Citrate cycle, first carbon oxidation, oxaloacetate => 2-oxoglutarate			No Chg
			ISCW018459-PA	AP-3 complex subunit delta-1, putative	1	K12396 AP-3 complex subunit delta-1	Lysosome			No Chg
			ISCW017658-PA	dolichyl-di-phosphooligosaccharide protein glycotransferase, putative	1	K12670 oligosaccharyltransferase complex subunit beta	N-Glycan biosynthesis""Protein processing in endoplasmic reticulum""Oligosaccharyltransferase			No Chg
			ISCW021433-PA	acyl-CoA reductase, putative	1	K13356 fatty acyl-CoA reductase	Peroxisome			No Chg
			ISCW006968-PA	small nuclear ribonucleoprotein Sm D1, putative	1	K11087 small nuclear ribonucleoprotein D1	Spliceosome""Sm core complex			No Chg

## Sheet: 486 proteins by orthology
Color coding	Identified out of 4 statistical datasets		No orthologs	VectorBase Accession ID	Name	# peptides	KEGG Ortholog	ISCW pathway	LGTV/MOCK Fold Change	UV-LGTV/MOCK Fold Change			Orthologs with no ISCW pathways	VectorBase Accession ID	Name	# peptides	KEGG Ortholog	ISCW pathway	LGTV/MOCK Fold Change	UV-LGTV/MOCK Fold Change				Orthologs with ISCW path	VectorBase Accession ID	Name	# peptides	KEGG Ortholog	ISCW pathway	LGTV/MOCK Fold Change	UV-LGTV/MOCK Fold Change
ISCW018899-PA	All 4		221	ISCW020655-PA	16 kDa thioredoxion, putative	3			No Chg	0.477586			89	ISCW000012-PA	spectrin alpha chain, putative	6	K06114 spectrin alpha		0.424677	0.274412				176	ISCW006222-PA	proteasome beta2 subunit, putative	1	K02739 20S proteasome subunit beta 2	Proteasome		No Chg
ISCW015592-PA	only ANOVA			ISCW015373-PA	29 kDa ribonucleoprotein B, putative	1				No Chg				ISCW000339-PA	lamin, putative	18	K07611 lamin B		0.245404	No Chg					ISCW013384-PA	molecular chaperone, putative	2	K09502 DnaJ homolog subfamily A member 1	Protein processing in endoplasmic reticulum	No Chg	2.81933
ISCW022213-PA	ANOVA and virus vs mock			ISCW015565-PA	40S ribosomal protein S18, putative	1			0.162122	No Chg				ISCW000538-PA	vasa intronic protein, putative	1	K13199 plasminogen activator inhibitor 1 RNA-binding protein		0.202753	0.1					ISCW017361-PA	40S ribosomal protein S12, putative	1	K02951 small subunit ribosomal protein S12e	Ribosome
ISCW015602-PA	ANOVA and uvvirus vs mock			ISCW012954-PA	40S ribosomal protein S27, putative	1			No Chg	No Chg				ISCW000781-PA	voltage-dependent anion-selective channel, putative	2	K15040 voltage-dependent anion channel protein 2		No Chg	No Chg					ISCW015982-PA	aldehyde dehydrogenase, putative	7	K00294 1-pyrroline-5-carboxylate dehydrogenase	Alanine, aspartate and glutamate metabolism""Arginine and proline metabolism	2.69035	5.06363
ISCW004779-PA	ANOVA, virus vs mock, and uvvirus vs mock			ISCW001988-PA	ABC transporter, putative	1								ISCW001124-PA	nonmuscle myosin essential light chain	4	K12752 myosin light chain, invertebrate		0.165745	0.170186					ISCW000393-PA	glutamate dehydrogenase, putative	1	K00261 glutamate dehydrogenase (NAD(P)+)	Alanine, aspartate and glutamate metabolism""Arginine and proline metabolism""D-Glutamine and D-glutamate metabolism	10.1764	9.78532
ISCW024315-PA	ANOVA, virus vs mock, and virus vs uvvirus			ISCW002306-PA	acid methyltransferase, putative	1			10.0376	10.8805				ISCW001345-PA	acyl-CoA synthetase, putative	1	K00666 fatty-acyl-CoA synthase		0.182373	No Chg					ISCW018040-PA	alanyl-tRNA synthetase, putative	1	K01872 alanyl-tRNA synthetase	Aminoacyl-tRNA biosynthesis	11.5724
ISCW009367-PA	ANOVA, uvvirus vs mock, and virus vs uvvirus			ISCW001151-PA	acireductone dioxygenase, putative	1				10.6482				ISCW001427-PA	E1b-55kD-associated protein, putative	1	K15047 heterogeneous nuclear ribonucleoprotein U-like protein 1		0.120877						ISCW014576-PA	asparaginyl-tRNA synthetase, putative	1	K01893 asparaginyl-tRNA synthetase	Aminoacyl-tRNA biosynthesis	11.0412	No Chg
ISCW006983-PA	virus vs mock, uvvirus vs mock, and virus vs uvvirus			ISCW023355-PA	adenylate cyclase-associated protein, putative	1			No Chg					ISCW001739-PA	proline and glutamine-rich splicing factor (SFPQ), putative	12	K13219 splicing factor, proline- and glutamine-rich		0.413158	No Chg					ISCW018044-PA	lysyl-tRNA synthetase, putative	1	K04567 lysyl-tRNA synthetase, class II	Aminoacyl-tRNA biosynthesis	11.1277	9.02921
ISCW023355-PA	virus vs mock only			ISCW021497-PA	alpha chimerin, putative	1			No Chg					ISCW002300-PA	Core histone H2A/H2B/H3/H4	5	K11253 histone H3		0.405786	No Chg					ISCW017703-PA	CNDP dipeptidase, putative	6	K08660 cytosolic nonspecific dipeptidase	Arginine and proline metabolism""Histidine metabolism"" beta-Alanine metabolism	No Chg	No Chg
ISCW023837-PA	virus vs mock and uvvirus vs mock			ISCW000908-PA	alpha tubulin, putative	5			0.284919	2.64093				ISCW002493-PA	cyclophilin B precursor, putative	1	K03768 peptidyl-prolyl cis-trans isomerase B (cyclophilin B)		10.0147						ISCW017350-PA	DNA-binding protein, putative	6	K10802 high mobility group protein B1	Base excision repair	0.345872	0.408586
ISCW020189-PA	uvvirus vs mock and virus vs uvvirus			ISCW018899-PA	alpha tubulin, putative	1			0.139476	No Chg				ISCW002538-PA	Na+/K+ ATPase, alpha subunit, putative	1	K01539 sodium/potassium-transporting ATPase subunit alpha		0.197209	No Chg					ISCW019519-PA	poly [ADP-ribose] polymerase, putative	2	K10798 poly [ADP-ribose] polymerase	Base excision repair""BER complex	9.25196	No Chg
ISCW008709-PA	virus vs mock and virus vs uvvirus			ISCW002513-PA	alpha-crystallin B chain, putative	1				0.244026				ISCW003221-PA	pterin-4-alpha-carbinolamine dehydratase, putative	1	K01724 4a-hydroxytetrahydrobiopterin dehydratase		9.73726						ISCW009919-PA	ATP-citrate synthase, putative	1	K01648 ATP citrate (pro-S)-lyase	Citrate cycle (TCA cycle)		No Chg
ISCW008741-PA	uvvirus vs mock only			ISCW002531-PA	alternative splicing factor ASF/SF2, putative	1			0.0193011	0.0430671				ISCW003366-PA	stathmin, putative	1	K04381 stathmin		No Chg	No Chg					ISCW020593-PA	fumarase, putative	1	K01679 fumarate hydratase, class II	Citrate cycle (TCA cycle)	0.150394	0.0295641
ISCW017361-PA	virus vs uvvirus only			ISCW006983-PA	alternative splicing factor SRp20/9G8, putative	2			No Chg	No Chg				ISCW003606-PA	dynein light chain	2	K10418 dynein light chain LC8-type		No Chg	No Chg					ISCW009586-PA	citrate synthase, putative	5	K01647 citrate synthase	Citrate cycle (TCA cycle)"" Glyoxylate and dicarboxylate metabolism""Citrate cycle, first carbon oxidation, oxaloacetate => 2-oxoglutarate	0.203709	No Chg
				ISCW000263-PA	anhydro-N-acetylmuramic acid kinase, putative	2			2.38381	No Chg				ISCW004442-PA	splicing factor hnRNP-F, putative	2	K12898 heterogeneous nuclear ribonucleoprotein F/H		0.179109	0.265482					ISCW004116-PA	isocitrate dehydrogenase, putative	1	K00030 isocitrate dehydrogenase (NAD+)	Citrate cycle (TCA cycle)""Citrate cycle, first carbon oxidation, oxaloacetate => 2-oxoglutarate
				ISCW004958-PA	ankyrin repeat-containing protein	1			10.0376	10.8805				ISCW004478-PA	histone 2A	2	K11251 histone H2A		2.34418	0.0603166					ISCW001977-PA	NADP-dependent isocitrate dehydrogenase, putative	6	K00031 isocitrate dehydrogenase	Citrate cycle (TCA cycle)""Glutathione metabolism"" Peroxisome	No Chg	No Chg
				ISCW006484-PA	arginine-rich protein, putative	1			0.1	0.100802				ISCW004620-PA	elongation factor 1-beta	2	K03232 elongation factor 1-beta		No Chg	No Chg					ISCW007624-PA	malate dehydrogenase, putative	1	K00025 malate dehydrogenase	Citrate cycle (TCA cycle)""Pyruvate metabolism"" Glyoxylate and dicarboxylate metabolism		No Chg
				ISCW001951-PA	ATPase inhibitor, putative	1			No Chg	8.53972				ISCW004899-PA	quinone oxidoreductase, putative	1	K00344 NADPH2:quinone reductase			No Chg					ISCW003528-PA	malate dehydrogenase, putative	4	K00026 malate dehydrogenase	Citrate cycle (TCA cycle)""Pyruvate metabolism""Glyoxylate and dicarboxylate metabolism	3.25798	No Chg
				ISCW017136-PA	beta tubulin	1			0.235824	1.72117				ISCW005016-PA	nucleosome assembly protein NAP-1, putative	1	K11279 nucleosome assembly protein 1-like 1								ISCW015944-PA	S-adenosylhomocysteine hydrolase, putative	3	K01251 adenosylhomocysteinase	Cysteine and methionine metabolism""Methionine degradation	0.123538	No Chg
				ISCW007794-PA	beta-ketoacyl synthase, putative	1			10.0308	8.59139				ISCW005319-PA	KH domain RNA binding protein, putative	5	K13210 far upstream element-binding protein		0.420294	No Chg					ISCW023354-PA	DNA replication licensing factor, putative	1	K02541 minichromosome maintenance protein 3	DNA replication		No Chg
				ISCW012121-PA	beta-ketoacyl-ACP reductase, putative	1			No Chg	No Chg				ISCW006034-PA	secreted salivary gland peptide, putative	3	K03671 thioredoxin 1		No Chg	2.66804					ISCW022029-PA	DNA polymerase delta processivity factor, putative	4	K04802 proliferating cell nuclear antigen	DNA replication""Base excision repair""Nucleotide excision repair""Mismatch repair	No Chg	No Chg
				ISCW005137-PA	beta-tubulin, putative	12			No Chg	No Chg				ISCW006277-PA	RNA polymerase II proteinral transcription factor BTF3, putative	1	K01527 nascent polypeptide-associated complex subunit beta		No Chg						ISCW007146-PA	RNA-binding protein musashi, putative	6	K03102 squid	Dorso-ventral axis formation	No Chg	No Chg
				ISCW007069-PA	brain acid soluble protein, putative	2			0.104063	0.231337				ISCW006326-PA	actin depolymerizing factor, putative	6	K05765 cofilin		0.045483	0.196622					ISCW009943-PA	laminin gamma-1 chain, putative	1	K05635 laminin, gamma 1	ECM-receptor interaction		10.0822
				ISCW022213-PA	breakpoint cluster region protein, putative	1			9.90279					ISCW006407-PA	programmed cell death, putative	1	K06875 programmed cell death protein 5		0.1	0.1					ISCW021969-PA	RAB-9 and, putative	2	K07897 Ras-related protein Rab-7A	Endocytosis""Phagosome	No Chg	3.6115
				ISCW022876-PA	ca(2+)/calmodulin-dependent protein kinase phosphatase, putative	1								ISCW006566-PA	FK506 binding protein (FKBP), putative	4	K09571 FK506-binding protein 4/5		No Chg	No Chg					ISCW005185-PA	hypothetical protein	1	K10484 structure-specific endonuclease subunit SLX4 (BTB/POZ domain-containing protein 12)	Fanconi anemia pathway	No Chg
				ISCW021456-PA	calcyphosine/tpp, putative	1			0.280592	No Chg				ISCW006702-PA	microtubule-binding protein, putative	4	K10436 microtubule-associated protein, RP/EB family		0.0648315	0.252081					ISCW001274-PA	medium-chain acyl-CoA dehydrogenase, putative	1	K00249 acyl-CoA dehydrogenase	Fatty acid metabolism"Valine, leucine and isoleucine degradation""beta-Alanine metabolism""Propanoate metabolism""Malonate semialdehyde pathway, propanoyl-CoA => Acetyl-CoA""beta-Oxidation	0.128055	0.0427445
				ISCW021202-PA	calponin, putative	6			0.398864	0.366113				ISCW006712-PA	TNF-alpha induced protein B12, putative	1	K15074 BTB/POZ domain-containing adapter for CUL3-mediated RhoA degradation protein			9.11374					ISCW016117-PA	acetyl-CoA acetyltransferase, putative	2	K00626 acetyl-CoA C-acetyltransferase	Fatty acid metabolismSynthesis and degradation of ketone bodiesValine, leucine and isoleucine degradationLysine degradationTryptophan metabolismPyruvate metabolismGlyoxylate and dicarboxylate metabolismPropanoate metabolismButanoate metabolismTerpenoid backbone biosynthesis	3.26208	8.59139
				ISCW002354-PA	calumenin, putative	6			No Chg	No Chg				ISCW007582-PA	zinc finger protein, putative	5	K13203 zinc finger RNA-binding protein		0.137318	No Chg					ISCW003100-PA	conserved hypothetical protein	2	K01255 leucyl aminopeptidase	Glutathione metabolism	10.4728	9.57712
				ISCW006744-PA	caveolin, putative	1			0.112699	No Chg				ISCW007627-PA	chaperonin complex component, TCP-1 delta subunit, putative	1	K09496 T-complex protein 1 subunit delta		No Chg	0.150999					ISCW022157-PA	glutathione S-transferase, putative	10	K00799 glutathione S-transferase	Glutathione metabolism""Metabolism of xenobiotics by cytochrome P450""Drug metabolism - cytochrome P450	0.337306	0.321657
				ISCW016777-PA	Cdc42 protein, putative	1			0.122339	0.204446				ISCW008497-PA	cyclophilin A, putative	4	K09565 peptidyl-prolyl isomerase F (cyclophilin D)		0.275215	0.347997					ISCW004779-PA	1-acyl-sn-glycerol-3-phosphate acyltransferase zeta, putative	1	K13506 glycerol-3-phosphate O-acyltransferase 3/4	Glycerolipid metabolism""Glycerophospholipid metabolism	No Chg	No Chg
				ISCW019185-PA	cell adhesion molecule, putative	1			0.130228	No Chg				ISCW008629-PA	aminopeptidase, putative	1	K08776 puromycin-sensitive aminopeptidase		0.1	0.1					ISCW019963-PA	glyoxylate/hydroxypyruvate reductase, putative	2	K00049 glyoxylate/hydroxypyruvate reductase	Glycine, serine and threonine metabolism""Pyruvate metabolism""Glyoxylate and dicarboxylate metabolism	No Chg	No Chg
				ISCW015666-PA	cellular nucleic acid binding protein, putative	1			0.292167	0.158031				ISCW008740-PA	cytochrome C, putative	1	K08738 cytochrome c		10.535						ISCW018700-PA	glyceraldehyde 3-phosphate dehydrogenase, putative	4	K00134 glyceraldehyde 3-phosphate dehydrogenase	Glycolysis / Gluconeogenesis	0.385605	No Chg
				ISCW009365-PA	centrosome-associated protein CEP250, putative	1			No Chg	No Chg				ISCW008769-PA	cyclin T-dependent kinase CDK9, putative	1	K08827 serine/threonine-protein kinase PRP4		0.1	No Chg					ISCW020189-PA	aldehyde dehydrogenase, putative	1	K14085 aldehyde dehydrogenase family 7 member A1	Glycolysis / Gluconeogenesis""Ascorbate and aldarate metabolism""Fatty acid metabolism""Glycine, serine and threonine metabolism"" Valine, leucine and isoleucine degradation""Lysine biosynthesis""Lysine degradation""Arginine and proline metabolism""Histidine metabolism"" Tryptophan metabolism""beta-Alanine metabolism""Glycerolipid metabolism""Pyruvate metabolism""Propanoate metabolism""GABA biosy…		No Chg
				ISCW008709-PA	chaperonin complex component, TCP-1 delta subunit, putative	1			No Chg					ISCW009689-PA	heat shock protein 70 (HSP70)-interacting protein, putative	1	K09560 suppressor of tumorigenicity protein 13		8.62426						ISCW014613-PA	aldehyde dehydrogenase, putative	3	K00128 aldehyde dehydrogenase (NAD+)	Glycolysis / Gluconeogenesis""Pentose and glucuronate interconversions""Ascorbate and aldarate metabolism"" Fatty acid metabolism""Valine, leucine and isoleucine degradation""Lysine degradation""Arginine and proline metabolism""Histidine metabolism""Tryptophan metabolism""beta-Alanine metabolism"" Glycerolipid metabolism"" Pyruvate metabolism"" Propanoate metabolism	0.104399	0.217809
				ISCW002122-PA	chloride channel, putative	1				No Chg				ISCW010766-PA	translation elongation factor, putative	2	K02358 elongation factor Tu			0.1					ISCW011371-PA	fructose 1,6-bisphosphate aldolase, putative	4	K01623 fructose-bisphosphate aldolase, class I	Glycolysis / Gluconeogenesis""Pentose phosphate pathway""Fructose and mannose metabolism	0.192598	0.425759
				ISCW010173-PA	circadian locomoter output cycles kaput protein, putative	1				5.19526				ISCW010950-PA	ng,ng-dimethylarginine dimethylaminohydrolase, putative	1	K01482 dimethylargininase		11.5015						ISCW020197-PA	pyruvate kinase, putative	4	K00873 pyruvate kinase	Glycolysis / Gluconeogenesis""Purine metabolism""Pyruvate metabolism""Adenine ribonucleotide biosynthesis, IMP => ADP,ATP""Guanine ribonucleotide biosynthesis IMP => GDP,GTP	No Chg	No Chg
				ISCW011373-PA	Cniwi protein, putative	5			2.21654	3.02515				ISCW011192-PA	conserved hypothetical protein	1	K14790 nucleolar protein 9		10.18	10.2327					ISCW017666-PA	enolase, putative	1	K01689 enolase	Glycolysis / Gluconeogenesis""RNA degradation	No Chg
				ISCW006441-PA	coiled-coil tumor protein D52, putative	1			11.9344	4.6432				ISCW011314-PA	peptidyl-prolyl cis-trans isomerase, putative	2	K03768 peptidyl-prolyl cis-trans isomerase B (cyclophilin B)		0.1	0.1					ISCW004397-PA	tetraspanin, putative	4	K06497 CD63 antigen	Lysosome	0.375498	0.0940093
				ISCW000028-PA	conserved hypothetical protein	1				No Chg				ISCW011376-PA	multifunctional chaperone, putative	5	K06630 tyrosine 3-monooxygenase/tryptophan 5-monooxygenase activation protein		0.309126	No Chg					ISCW011597-PA	saposin, putative	4	K12382 saposin	Lysosome	0.452785	2.19858
				ISCW000122-PA	conserved hypothetical protein	1			0.1	0.1				ISCW012234-PA	histone, putative	4	K11275 histone H1/5		0.136202	0.0411118					ISCW018459-PA	AP-3 complex subunit delta-1, putative	1	K12396 AP-3 complex subunit delta-1	Lysosome
				ISCW000607-PA	conserved hypothetical protein	1				0.268687				ISCW012592-PA	transcription factor containing NAC and TS-N domains, putative	3	K03626 nascent polypeptide-associated complex subunit alpha		0.136368	No Chg					ISCW019441-PA	clathrin heavy chain, putative	2	K04646 clathrin heavy chain	Lysosome""Endocytosis	No Chg	No Chg
				ISCW001851-PA	conserved hypothetical protein	1			0.1	0.12242				ISCW012705-PA	myosin, putative	1	K10356 myosin I		0.12257	0.109677					ISCW013073-PA	meiotic cell division protein Pelota/DOM34, putative	1	K06965 protein pelota	mRNA surveillance pathway	0.130228	No Chg
				ISCW003431-PA	conserved hypothetical protein	2			0.152463	1.42057				ISCW012934-PA	chaperonin complex component, TCP-1 theta subunit, putative	2	K09500 T-complex protein 1 subunit theta			No Chg					ISCW015573-PA	RNA recognition motif-containing protein	1	K14407 cleavage stimulation factor subunit 2	mRNA surveillance pathway	9.53345
				ISCW004355-PA	conserved hypothetical protein	1			No Chg	0.163665				ISCW013566-PA	alpha-actinin, putative	6	K05699 actinin alpha		No Chg	2.8799					ISCW014573-PA	splicing factor, putative	2	K14411 RNA-binding protein Musashi	mRNA surveillance pathway	0.464923	No Chg
				ISCW005014-PA	conserved hypothetical protein	6			0.275109	0.239328				ISCW013767-PA	thioredoxin peroxidase, putative	1	K03386 peroxiredoxin (alkyl hydroperoxide reductase subunit C)			2.06383					ISCW004710-PA	protein Mo25, putative	1	K08272 calcium binding protein 39	mTOR signaling pathway	11.7352	9.7944
				ISCW006678-PA	conserved hypothetical protein	1				0.219385				ISCW014488-PA	Der_and-312 phosphate carrier protein, putative	3	K15102 solute carrier family 25 (mitochondrial phosphate transporter), member 3			No Chg					ISCW012920-PA	glucosidase II, putative	1	K05546 alpha 1,3-glucosidase	N-Glycan biosynthesis""Protein processing in endoplasmic reticulum
				ISCW007832-PA	conserved hypothetical protein	1			0.1	0.1				ISCW014575-PA	electron transfer flavoprotein, alpha subunit, putative	1	K03522 electron transfer flavoprotein alpha subunit			0.1					ISCW016170-PA	ribophorin, putative	3	K12666 oligosaccharyltransferase complex subunit alpha (ribophorin I)	N-Glycan biosynthesis""Protein processing in endoplasmic reticulum""Oligosaccharyltransferase	0.130865	No Chg
				ISCW009407-PA	conserved hypothetical protein	1			No Chg	No Chg				ISCW014936-PA	abhydrolase domain-containing protein, putative	1	K13704 abhydrolase domain-containing protein 12		8.76822	No Chg					ISCW005017-PA	ribophorin II, putative	1	K12667 oligosaccharyltransferase complex subunit delta (ribophorin II)	N-Glycan biosynthesis""Protein processing in endoplasmic reticulum""Oligosaccharyltransferase	No Chg	No Chg
				ISCW009590-PA	conserved hypothetical protein	2			0.0652158	0.383444				ISCW015012-PA	flotillin, putative	1	K07192 flotillin		0.1	No Chg					ISCW017658-PA	dolichyl-di-phosphooligosaccharide protein glycotransferase, putative	1	K12670 oligosaccharyltransferase complex subunit beta	N-Glycan biosynthesis""Protein processing in endoplasmic reticulum""Oligosaccharyltransferase
				ISCW009705-PA	conserved hypothetical protein	5			No Chg	2.90751				ISCW015321-PA	thioredoxin-dependent peroxide reductase	2	K03386 peroxiredoxin (alkyl hydroperoxide reductase subunit C)		10.5709	No Chg					ISCW007830-PA	histone deacetylase 1, 2 ,3, putative	1	K06067 histone deacetylase 1/2	Notch signaling pathway	0.1	0.1
				ISCW009790-PA	conserved hypothetical protein	1								ISCW015380-PA	elongation factor, putative	11	K03234 elongation factor 2		0.216712	No Chg					ISCW011548-PA	nucleotide excision repair factor NEF2, RAD23 component, putative	1	K10839 UV excision repair protein RAD23	Nucleotide excision repair""Protein processing in endoplasmic reticulum	0.162222	0.182378
				ISCW011052-PA	conserved hypothetical protein	1			0.1	2.51851				ISCW015757-PA	zinc finger protein, putative	1	K07876 Ras-related protein Rab-35			9.92908					ISCW007522-PA	hexosaminidase domain-containing protein, putative	1	K14459 hexosaminidase	Other glycan degradation	0.1	0.145165
				ISCW011861-PA	conserved hypothetical protein	1				0.1				ISCW016118-PA	retinoblastoma-binding protein, putative	1	K10752 histone-binding protein RBBP4		No Chg	No Chg					ISCW011988-PA	F0F1-type ATP synthase, alpha subunit, putative	9	K02132 F-type H+-transporting ATPase subunit alpha	Oxidative phosphorylation	0.243983	No Chg
				ISCW012874-PA	conserved hypothetical protein	1				11.0261				ISCW016230-PA	histone H1, putative	4	K11275 histone H1/5		0.348614	No Chg					ISCW012509-PA	F0F1-type ATP synthase, beta subunit, putative	10	K02133 F-type H+-transporting ATPase subunit beta	Oxidative phosphorylation	0.373269	0.420353
				ISCW013286-PA	conserved hypothetical protein	1			8.13001	9.87542				ISCW017579-PA	transcription factor NFAT, subunit NF45, putative	4	K13089 interleukin enhancer-binding factor 2		0.491227	No Chg					ISCW018418-PA	ATP synthase H+ transporting, F1 complex, delta subunit precursor, putative	1	K02134 F-type H+-transporting ATPase subunit delta	Oxidative phosphorylation	0.1	0.1
				ISCW013712-PA	conserved hypothetical protein	1								ISCW017659-PA	eIF2-interacting protein ABC50, putative	1	K06158 ATP-binding cassette, subfamily F, member 3		No Chg	0.0341426					ISCW016217-PA	ATP synthase D chain, putative	1	K02138 F-type H+-transporting ATPase subunit d	Oxidative phosphorylation	0.221608	No Chg
				ISCW017015-PA	conserved hypothetical protein	1				No Chg				ISCW017823-PA	heat shock protein	2	K04078 chaperonin GroES		0.1	0.11721					ISCW000951-PA	NADH dehydrogenase	1	K03948 NADH dehydrogenase (ubiquinone) 1 alpha subcomplex 4	Oxidative phosphorylation		3.87756
				ISCW019381-PA	conserved hypothetical protein	1			0.1	No Chg				ISCW017832-PA	fork head domain protein, putative	1	K09403 forkhead box protein J2/3		0.1	2.0084					ISCW004822-PA	carbon-nitrogen hydrolase, putative	4	K08069 pantetheine hydrolase	Pantothenate and CoA biosynthesis	2.45063	No Chg
				ISCW019741-PA	conserved hypothetical protein	2			0.0616537	0.0549057				ISCW018081-PA	actin-binding protein ipp, putative	1	K13956 actin-binding protein IPP			10.0951					ISCW002128-PA	aldo-keto reductase, putative	3	K00011 aldehyde reductase	Pentose and glucuronate interconversions""Fructose and mannose metabolism""Galactose metabolism"" Glycerolipid metabolism""Pyruvate metabolism	0.108899	No Chg
				ISCW019749-PA	conserved hypothetical protein	6			0.154192	0.187352				ISCW018424-PA	Ran-binding protein, putative	1	K15306 Ran-binding protein 1		0.0872692	0.173399					ISCW023506-PA	transaldolase, putative	2	K00616 transaldolase	Pentose phosphate pathway	0.381184	No Chg
				ISCW020127-PA	conserved hypothetical protein	2			9.18617	6.47138				ISCW018470-PA	double-stranded RNA-specific editase B2, putative	4	K13194 double stranded RNA-specific editase B		0.42849	2.2769					ISCW016585-PA	manganese superoxide dismutase, putative	1	K04564 superoxide dismutase, Fe-Mn family	Peroxisome		0.191641
				ISCW022293-PA	conserved hypothetical protein	1			9.69489					ISCW018880-PA	polycomb protein SCMH1, putative	1	K11461 polycomb protein SCMH1			0.017514					ISCW010532-PA	alkyl hydroperoxide reductase, thiol specific antioxidant, putative	3	K13279 peroxiredoxin 1	Peroxisome	0.174538	No Chg
				ISCW022875-PA	conserved hypothetical protein	3			0.268434	0.290067				ISCW019100-PA	DEAD box ATP-dependent RNA helicase, putative	1	K11594 ATP-dependent RNA helicase			3.10942					ISCW021433-PA	acyl-CoA reductase, putative	1	K13356 fatty acyl-CoA reductase	Peroxisome
				ISCW023315-PA	conserved hypothetical protein	1			0.118525	0.1				ISCW019496-PA	histone H2B, putative	5	K11252 histone H2B		0.0272395	0.137304					ISCW024111-PA	actin, putative	14	K05692 actin beta/gamma 1	Phagosome	0.265958	0.215903
				ISCW023399-PA	conserved hypothetical protein	1			0.153523					ISCW019498-PA	histone H4, putative	8	K11254 histone H4		No Chg	No Chg					ISCW003527-PA	alpha tubulin	9	K07374 tubulin alpha	Phagosome	0.232732	No Chg
				ISCW023694-PA	conserved hypothetical protein	1			10.1506	11.4515				ISCW019646-PA	hypothetical protein	2	K06095 multiple PDZ domain protein		0.466937	0.164306					ISCW017133-PA	beta tubulin	8	K07375 tubulin beta	Phagosome	0.191004	0.468882
				ISCW004571-PA	cytochrome b5 domain-containing protein, putative	1				10.6724				ISCW020327-PA	conserved hypothetical protein	1	K11374 elongator complex protein 2		0.1						ISCW015592-PA	calmodulin, putative	1	K02183 calmodulin	Phosphatidylinositol signaling system
				ISCW022108-PA	cytochrome B5, putative	3			No Chg	No Chg				ISCW020373-PA	translation initiation factor 5A	1	K03263 translation initiation factor 5A								ISCW018719-PA	glutamyl-tRNA synthetase, cytoplasmic, putative	1	K14163 bifunctional glutamyl/prolyl-tRNA synthetase	Porphyrin and chlorophyll metabolism"" Aminoacyl-tRNA biosynthesis		10.2199
				ISCW015665-PA	DEAD box ATP-dependent RNA helicase, putative	1								ISCW020554-PA	RNA-binding protein, putative	1	K11294 nucleolin		No Chg	No Chg					ISCW015486-PA	paramyosin, putative	1	K06638 mitotic spindle assembly checkpoint protein MAD1	Progesterone-mediated oocyte maturation		0.282916
				ISCW008433-PA	dehydrogenase, putative	1			0.1	0.1				ISCW020850-PA	prefoldin, putative	1	K09548 prefoldin subunit 1			No Chg					ISCW010978-PA	20S proteasome, regulatory subunit alpha type PSMA1/PRE5, putative	2	K02725 20S proteasome subunit alpha 6	Proteasome	No Chg	No Chg
				ISCW001850-PA	DEK domain-containing protein, putative	4			0.401938	0.46609				ISCW020878-PA	rho GDP dissociation inhibitor, putative	3	K12462 Rho GDP-dissociation inhibitor		No Chg	2.42961					ISCW005463-PA	proteasome alpha subunit, putative	1	K02727 20S proteasome subunit alpha 7	Proteasome	0.248717	0.1
				ISCW000865-PA	EF hand domain-containing protein, putative	1			0.102792	0.146252				ISCW021350-PA	DNA replication factor/protein phosphatase inhibitor SET/SPR-2, putative	7	K11290 template-activating factor I		0.252809	No Chg					ISCW007139-PA	20S proteasome, regulatory subunit alpha type PSMA7/PRE6, putative	2	K02731 20S proteasome subunit alpha 4	Proteasome	9.69844	8.49144
				ISCW008893-PA	extended synaptotagmin-2, putative	1				No Chg				ISCW021388-PA	serine/threonine protein kinase, putative	1	K04412 serine/threonine kinase 3		9.09141						ISCW006948-PA	20S proteasome, regulatory subunit beta, putative	1	K02735 20S proteasome subunit beta 3	Proteasome	0.19891	0.12807
				ISCW008291-PA	failed axon connections, putative	5			0.366821	No Chg				ISCW021452-PA	vinculin, putative	8	K05700 vinculin		0.314374	No Chg					ISCW021692-PA	26S proteasome regulatory subunit rpn1, putative	1	K03028 26S proteasome regulatory subunit N1	Proteasome	0.1	0.194008
				ISCW004404-PA	fascin, putative	1			0.135706	No Chg				ISCW021585-PA	spectrin beta chain, putative	5	K06115 spectrin beta		No Chg	No Chg					ISCW018294-PA	ATPase, putative	1	K03062 26S proteasome regulatory subunit T2	Proteasome	0.1	0.1
				ISCW015316-PA	fatty acid-binding protein FABP, putative	7			No Chg	No Chg				ISCW021753-PA	ADP/ATP translocase, putative	2	K05863 solute carrier family 25 (mitochondrial adenine nucleotide translocator), member 4/5/6/31		0.1	0.479587					ISCW008741-PA	26S proteasome regulatory complex, ATPase RPT6, putative	1	K03066 26S proteasome regulatory subunit T6	Proteasome		No Chg
				ISCW002430-PA	FKBP-type peptidyl-prolyl cis-trans isomerase, putative	2			0.392034	2.84432				ISCW021887-PA	single-minded, putative	1	K09100 single-minded		No Chg	No Chg					ISCW017299-PA	signal recognition particle protein, putative	1	K03108 signal recognition particle subunit SRP72	Protein export		12.214
				ISCW011734-PA	flavonol reductase/cinnamoyl-CoA reductase, putative	6			0.157935	0.241368				ISCW022151-PA	conserved hypothetical protein	1	K04600 cadherin EGF LAG seven-pass G-type receptor 1 (flamingo)								ISCW017754-PA	heat shock protein, putative	15	K09490 heat shock 70kDa protein 5	Protein export"" Protein processing in endoplasmic reticulum	0.293603	0.455431
				ISCW022311-PA	furrowed, putative	1			10.3849	10.319				ISCW022880-PA	hypothetical protein	1	K09313 homeobox protein cut-like		9.37659						ISCW008339-PA	translocation protein SEC62, putative	1	K12275 translocation protein SEC62	Protein export"" Protein processing in endoplasmic reticulum	No Chg	No Chg
				ISCW004858-PA	G-3-P dehydrogenase, putative	9			No Chg	No Chg				ISCW023148-PA	profilin, putative	3	K05759 profilin		0.1	0.319777					ISCW006829-PA	ubiquilin 1,2, putative	2	K04523 ubiquilin	Protein processing in endoplasmic reticulum	0.12056	9.39944
				ISCW018379-PA	gastric mucin, putative	1								ISCW023257-PA	sirtuin type, putative	1	K11412 NAD-dependent deacetylase sirtuin 2			0.140197					ISCW016161-PA	protein disulfide isomerase, putative	9	K08056 protein disulfide isomerase family A, member 3	Protein processing in endoplasmic reticulum	No Chg	No Chg
				ISCW017892-PA	GDI-1 GDP dissociation inhibitor, putative	5			No Chg	No Chg				ISCW023338-PA	talin, putative	2	K06271 talin		3.55902	3.14298					ISCW013550-PA	protein kinase C substrate, 80 KD protein, heavy chain, putative	1	K08288 protein kinase C substrate 80K-H	Protein processing in endoplasmic reticulum	0.106791	0.1
				ISCW020361-PA	glutamine synthetase 1, putative	1			0.116308	0.10975				ISCW023394-PA	ubiquitin carboxyl-terminal hydrolase isozyme L3, putative	1	K05609 ubiquitin carboxyl-terminal hydrolase L3		2.33715	No Chg					ISCW012646-PA	hypoxia up-regulated protein, putative	3	K09486 hypoxia up-regulated 1	Protein processing in endoplasmic reticulum	No Chg	0.126799
				ISCW006071-PA	GTP binding protein Rab-1A	2			0.1	0.367475				ISCW023397-PA	chaperonin complex component, TCP-1 eta subunit, putative	1	K09499 T-complex protein 1 subunit eta		0.102449	0.198888					ISCW022766-PA	tumor rejection antigen (gp96), putative	7	K09487 heat shock protein 90kDa beta	Protein processing in endoplasmic reticulum	No Chg	No Chg
				ISCW015120-PA	GTP-binding protein, putative	1				0.154373				ISCW023498-PA	sulfate/bicarbonate/oxalate exchanger SAT-1, putative	1	K14453 solute carrier family 26, other		0.0106439	No Chg					ISCW010827-PA	protein disulfide isomerase, putative	9	K09580 protein disulfide-isomerase A1	Protein processing in endoplasmic reticulum	No Chg	No Chg
				ISCW017709-PA	heat shock protein 20.6, putative	5			0.236811	0.338881				ISCW023555-PA	conserved hypothetical protein	1	K10392 kinesin family member 1/13/14		No Chg	No Chg					ISCW002080-PA	protein disulfide isomerase 1, putative	5	K09584 protein disulfide-isomerase A6	Protein processing in endoplasmic reticulum	0.480698	2.10312
				ISCW019164-PA	heat shock protein 70 (HSP70), putative	1			11.5015					ISCW023837-PA	acid methyltransferase, putative	1	K10718 juvenile hormone acid methyltransferase		No Chg	No Chg					ISCW018425-PA	secreted protein, putative	4	K09586 endoplasmic reticulum protein 29	Protein processing in endoplasmic reticulum	2.02397	2.17793
				ISCW008890-PA	heat shock protein 70 (HSP70)-interacting protein, putative	1				0.142387				ISCW023973-PA	protein arginine N-methyltransferase PRMT1, putative	1	K11434 protein arginine N-methyltransferase 1		No Chg						ISCW012623-PA	lectin, putative	2	K10082 lectin, mannose-binding 2	Protein processing in endoplasmic reticulum	No Chg	No Chg
				ISCW000190-PA	heat shock protein, putative	1			0.1	0.1				ISCW024783-PA	guanine nucleotide-binding protein, putative	1	K14753 guanine nucleotide-binding protein subunit beta-2-like 1 protein								ISCW009068-PA	membrane protein, putative	1	K11519 Derlin-1	Protein processing in endoplasmic reticulum	No Chg	0.10322
				ISCW001762-PA	heat shock protein, putative	6			0.152216	0.208456															ISCW009367-PA	B-cell receptor-associated protein, putative	1	K14009 B-cell receptor-associated protein 31	Protein processing in endoplasmic reticulum		0.1
				ISCW009157-PA	heat shock protein, putative	2			0.167828	0.422459															ISCW003709-PA	calnexin, putative	1	K08054 calnexin	Protein processing in endoplasmic reticulum"" Phagosome	8.95083	10.739
				ISCW011425-PA	heat shock protein, putative	1			No Chg																ISCW014265-PA	Hsp90 protein, putative	18	K04079 molecular chaperone HtpG	Protein processing in endoplasmic reticulum"" Progesterone-mediated oocyte maturation	0.192109	0.319286
				ISCW016090-PA	heat shock protein, putative	10			0.320318	No Chg															ISCW009326-PA	protein transport protein sec23, putative	1	K14006 protein transport protein SEC23	Protein processing in endoplasmic reticulum""COPII complex		11.3966
				ISCW011795-PA	helix-loop-helix transcription factor, putative	1			No Chg	0.1															ISCW008184-PA	calreticulin, putative	7	K08057 calreticulin	Protein processing in endoplasmic reticulum""Phagosome	0.492222	No Chg
				ISCW011972-PA	histidine triad (hit) protein, putative	1			9.37159	10.1884															ISCW012704-PA	signal sequence receptor beta	1	K13250 translocon-associated protein subunit beta	Protein processing in endoplasmic reticulum""Translocon-associated protein (TRAP) complex	No Chg	No Chg
				ISCW004473-PA	histone 2A, putative	1				No Chg															ISCW023074-PA	nucleoside diphosphate kinase, putative	3	K00940 nucleoside-diphosphate kinase	Purine metabolism""Pyrimidine metabolism""Adenine ribonucleotide biosynthesis, IMP => ADP,ATP"" Guanine ribonucleotide biosynthesis IMP => GDP,GTP""Pyrimidine ribonucleotide biosynthesis, UMP => UDP/UTP,CDP/CTP	0.212998	1.63305
				ISCW013046-PA	histone H2B, putative	1			0.1	0.0546723															ISCW016837-PA	ribonucleotide reductase, beta subunit, putative	1	K10808 ribonucleoside-diphosphate reductase subunit M2	Purine metabolism""Pyrimidine metabolism""Glutathione metabolism	0.496436	0.460509
				ISCW000276-PA	hypothetical protein	1			0.128929	0.1															ISCW012446-PA	cytidylate kinase, putative	2	K13800 UMP-CMP kinase	Pyrimidine metabolism	2.34985	3.52719
				ISCW000713-PA	hypothetical protein	1				2.28441															ISCW015602-PA	60S ribosomal protein L10A, putative	2	K02865 large subunit ribosomal protein L10Ae	Ribosome		0.16416
				ISCW001903-PA	hypothetical protein	1				0.219385															ISCW017543-PA	60S ribosomal protein L10, putative	2	K02866 large subunit ribosomal protein L10e	Ribosome	No Chg	0.191127
				ISCW002273-PA	hypothetical protein	1				0.339942															ISCW000476-PA	ribosomal protein L11, putative	1	K02868 large subunit ribosomal protein L11e	Ribosome		No Chg
				ISCW002421-PA	hypothetical protein	1			No Chg	No Chg															ISCW004058-PA	ribosomal protein L12, putative	2	K02870 large subunit ribosomal protein L12e	Ribosome	No Chg	No Chg
				ISCW002602-PA	hypothetical protein	1			0.224748	0.1															ISCW019130-PA	ribosomal protein L13A, putative	2	K02872 large subunit ribosomal protein L13Ae	Ribosome	No Chg	0.399223
				ISCW003181-PA	hypothetical protein	1				No Chg															ISCW023068-PA	60S ribosomal protein L13, putative	1	K02873 large subunit ribosomal protein L13e	Ribosome	10.4525
				ISCW003520-PA	hypothetical protein	1				0.100774															ISCW000979-PA	60S ribosomal protein L14, putative	1	K02875 large subunit ribosomal protein L14e	Ribosome	0.153885	0.212689
				ISCW003761-PA	hypothetical protein	1			0.1																ISCW008173-PA	ribosomal protein L15, putative	2	K02877 large subunit ribosomal protein L15e	Ribosome	0.21667	No Chg
				ISCW004566-PA	hypothetical protein	1			No Chg	No Chg															ISCW005425-PA	60S ribosomal protein L17	2	K02880 large subunit ribosomal protein L17e	Ribosome	10.7735	No Chg
				ISCW004697-PA	hypothetical protein	1			9.88611																ISCW010039-PA	ribosomal protein L18A, putative	2	K02882 large subunit ribosomal protein L18Ae	Ribosome	0.472576	No Chg
				ISCW005768-PA	hypothetical protein	1																			ISCW021924-PA	60S ribosomal protein L18	1	K02883 large subunit ribosomal protein L18e	Ribosome	0.334717	0.1
				ISCW006176-PA	hypothetical protein	1																			ISCW013810-PA	ribosomal protein L19, putative	1	K02885 large subunit ribosomal protein L19e	Ribosome	No Chg
				ISCW006298-PA	hypothetical protein	2			0.146108	No Chg															ISCW017347-PA	ribosomal protein L21, putative	1	K02889 large subunit ribosomal protein L21e	Ribosome	8.90837
				ISCW007583-PA	hypothetical protein	1			No Chg	0.243493															ISCW024803-PA	60S ribosomal protein L23, putative	3	K02893 large subunit ribosomal protein L23Ae	Ribosome	No Chg	No Chg
				ISCW007704-PA	hypothetical protein	1			0.150234	0.1															ISCW021749-PA	ribosomal protein L27A, putative	1	K02900 large subunit ribosomal protein L27Ae	Ribosome		8.75829
				ISCW007801-PA	hypothetical protein	1			0.122895	0.129638															ISCW005008-PA	60S ribosomal protein L27, putative	1	K02901 large subunit ribosomal protein L27e	Ribosome	0.3975	8.72342
				ISCW008773-PA	hypothetical protein	1			0.0208078	0.1															ISCW024424-PA	60S ribosomal protein L35A, putative	1	K02917 large subunit ribosomal protein L35Ae	Ribosome	No Chg	0.197597
				ISCW008823-PA	hypothetical protein	1			10.7324	8.90898															ISCW017219-PA	ribosomal protein L35, putative	2	K02918 large subunit ribosomal protein L35e	Ribosome	0.105127	No Chg
				ISCW009032-PA	hypothetical protein	1			0.0565187	0.178647															ISCW023076-PA	ribosomal protein L3, putative	2	K02925 large subunit ribosomal protein L3e	Ribosome	0.346293	No Chg
				ISCW009045-PA	hypothetical protein	1			No Chg																ISCW007478-PA	ribosomal protein L4, putative	3	K02930 large subunit ribosomal protein L4e	Ribosome	0.240105	0.465279
				ISCW009421-PA	hypothetical protein	1				0.1															ISCW017610-PA	60S ribosomal protein L5, putative	1	K02932 large subunit ribosomal protein L5e	Ribosome	No Chg	0.143045
				ISCW009602-PA	hypothetical protein	1			No Chg																ISCW016112-PA	ribosomal protein L6, putative	6	K02934 large subunit ribosomal protein L6e	Ribosome	No Chg	0.473049
				ISCW010025-PA	hypothetical protein	1			No Chg	9.2494															ISCW014825-PA	60S ribosomal protein L7A, putative	1	K02936 large subunit ribosomal protein L7Ae	Ribosome	0.171847
				ISCW010405-PA	hypothetical protein	1			No Chg	No Chg															ISCW004030-PA	ribosomal protein, putative	4	K02937 large subunit ribosomal protein L7e	Ribosome	No Chg	No Chg
				ISCW010712-PA	hypothetical protein	1				9.16232															ISCW007303-PA	60S acidic ribosomal protein P0, putative	7	K02941 large subunit ribosomal protein LP0	Ribosome	No Chg	No Chg
				ISCW010765-PA	hypothetical protein	1			10.3277																ISCW006538-PA	60S acidic ribosomal protein P1, putative	1	K02942 large subunit ribosomal protein LP1	Ribosome	0.147343	No Chg
				ISCW011195-PA	hypothetical protein	3			2.28653	No Chg															ISCW010723-PA	ribosomal protein, putative	1	K02943 large subunit ribosomal protein LP2	Ribosome	9.10131
				ISCW011299-PA	hypothetical protein	2			0.155514	0.1															ISCW023883-PA	40S ribosomal protein S10, putative	3	K02947 small subunit ribosomal protein S10e	Ribosome	No Chg	2.43173
				ISCW012389-PA	hypothetical protein	1																			ISCW023299-PA	40S ribosomal protein S14, putative	1	K02955 small subunit ribosomal protein S14e	Ribosome	0.330172	No Chg
				ISCW012549-PA	hypothetical protein	1				0.100774															ISCW015484-PA	ribosomal protein S15Aa, putative	1	K02957 small subunit ribosomal protein S15Ae	Ribosome	No Chg
				ISCW013117-PA	hypothetical protein	1			9.88611																ISCW001811-PA	ribosomal protein S17, putative	2	K02962 small subunit ribosomal protein S17e	Ribosome	No Chg	No Chg
				ISCW013939-PA	hypothetical protein	1			0.1	No Chg															ISCW020743-PA	ribosomal protein S19, putative	1	K02966 small subunit ribosomal protein S19e	Ribosome	0.1	0.107104
				ISCW014417-PA	hypothetical protein	3			2.06186	2.2272															ISCW010752-PA	ribosomal protein S20, putative	1	K02969 small subunit ribosomal protein S20e	Ribosome	0.1	No Chg
				ISCW014447-PA	hypothetical protein	1			0.1	2.31013															ISCW012634-PA	40S ribosomal protein S23, putative	2	K02973 small subunit ribosomal protein S23e	Ribosome	No Chg	0.138766
				ISCW015951-PA	hypothetical protein	1			0.1	0.20745															ISCW000125-PA	40S ribosomal protein S27A, putative	3	K02977 small subunit ribosomal protein S27Ae	Ribosome	0.145824	0.349532
				ISCW017435-PA	hypothetical protein	1																			ISCW003489-PA	40S ribosomal protein, putative	2	K02981 small subunit ribosomal protein S2e	Ribosome	0.12946	0.155016
				ISCW017573-PA	hypothetical protein	1				No Chg															ISCW008069-PA	40S ribosomal protein S3A, putative	3	K02984 small subunit ribosomal protein S3Ae	Ribosome	0.2031	0.123995
				ISCW018385-PA	hypothetical protein	1																			ISCW024787-PA	40S ribosomal protein S4	1	K02987 small subunit ribosomal protein S4e	Ribosome	No Chg	No Chg
				ISCW018879-PA	hypothetical protein	1			0.1	0.1															ISCW012831-PA	40S ribosomal protein S5, putative	1	K02989 small subunit ribosomal protein S5e	Ribosome	0.0790925	0.119567
				ISCW019295-PA	hypothetical protein	1			0.283139	0.314037															ISCW015393-PA	ribosomal protein S8, putative	3	K02995 small subunit ribosomal protein S8e	Ribosome		No Chg
				ISCW019625-PA	hypothetical protein	1																			ISCW023083-PA	40S ribosomal protein S9, putative	4	K02997 small subunit ribosomal protein S9e	Ribosome	No Chg	0.277654
				ISCW020576-PA	hypothetical protein	3			9.40712	3.08981															ISCW018892-PA	H/ACA ribonucleoprotein complex protein, putative	1	K11130 H/ACA ribonucleoprotein complex subunit 3	Ribosome biogenesis in eukaryotes""H/ACA ribonucleoprotein complex		0.0190012
				ISCW020890-PA	hypothetical protein	2			0.00456422	0.000845748															ISCW021828-PA	GTP-binding nuclear protein RAN1, putative	1	K07936 GTP-binding nuclear protein Ran	Ribosome biogenesis in eukaryotes""RNA transport	No Chg	No Chg
				ISCW021590-PA	hypothetical protein	1				No Chg															ISCW023654-PA	GTP-binding nuclear protein RAN1, putative	1	K07936 GTP-binding nuclear protein Ran	Ribosome biogenesis in eukaryotes""RNA transport	0.1	0.230935
				ISCW021821-PA	hypothetical protein	1			0.0530829	0.0510205															ISCW019216-PA	box H/ACA snoRNP, putative	1	K12845 U4/U6 small nuclear ribonucleoprotein SNU13	Ribosome biogenesis in eukaryotes""Spliceosome	No Chg
				ISCW023296-PA	hypothetical protein	3			0.348783	0.374738															ISCW024315-PA	40S ribosomal protein S6, putative	1	K02991 small subunit ribosomal protein S6e	Ribosome; mTOR signaling pathway	8.80404
				ISCW023909-PA	hypothetical protein	1			0.1	0.155913															ISCW017192-PA	Hsp70, putative	6	K04043 molecular chaperone DnaK	RNA degradation	0.474922	No Chg
				ISCW024437-PA	hypothetical protein	1			No Chg	No Chg															ISCW017824-PA	chaperonin subunit, putative	11	K04077 chaperonin GroEL	RNA degradation	No Chg	0.396035
				ISCW002553-PA	integrin beta subunit, putative	2			9.25318	11.1878															ISCW020299-PA	translation elongation factor EF-1 alpha/Tu, putative	11	K03231 elongation factor 1-alpha	RNA transport	0.327752	0.357811
				ISCW013746-PA	ixoderin precursor, putative	1				0.368427															ISCW005364-PA	conserved hypothetical protein	1	K12160 small ubiquitin-related modifier	RNA transport		0.1
				ISCW001780-PA	leucine aminopeptidase, putative	1			10.3664	9.79635															ISCW015864-PA	translation initiation factor 4F, helicase subunit, putative	4	K03257 translation initiation factor 4A	RNA transport""eIF4F complex	No Chg	2.64127
				ISCW007116-PA	limbic system-associated membrane protein, putative	1			0.1	No Chg															ISCW013399-PA	DEAD box ATP-dependent RNA helicase, putative	1	K13025 ATP-dependent RNA helicase	RNA transport""mRNA surveillance pathway"" Spliceosome""Exon junction complex (EJC)		No Chg
				ISCW020507-PA	Lrriq2 protein, putative	1				No Chg															ISCW005076-PA	regulator of nonsense transcripts, putative	1	K14327 regulator of nonsense transcripts 2	RNA transport""mRNA surveillance pathway""Exon junction complex (EJC)	0.1	0.284771
				ISCW004288-PA	MACRO domain-containing protein, putative	1			No Chg	No Chg															ISCW014211-PA	apoptosis-promoting RNA-binding protein TIA-1/TIAR, putative	2	K13126 polyadenylate-binding protein	RNA transport""mRNA surveillance pathway""RNA degradation	0.1	No Chg
				ISCW001123-PA	Mapmodulin, putative	2			0.1	0.1															ISCW010314-PA	DEAD box ATP-dependent RNA helicase, putative	1	K12812 ATP-dependent RNA helicase UAP56/SUB2	RNA transport""mRNA surveillance pathway""Spliceosome""TREX complex""Exon junction complex (EJC)	No Chg	No Chg
				ISCW001521-PA	membrane protein, putative	1			10.7684	11.2656															ISCW001860-PA	THO complex subunit, putative	4	K12881 THO complex subunit 4	RNA transport""mRNA surveillance pathway""Spliceosome""TREX complex""Exon junction complex (EJC)	0.294939	8.46577
				ISCW010241-PA	Misexpression suppressor of KSR, putative	1				3.39568															ISCW000412-PA	synaptobrevin 1-2, putative	1	K08517 vesicle transport protein SEC22	SNARE interactions in vesicular transport""Phagosome	No Chg
				ISCW019002-PA	mitogen activated protein kinase kinase kinase 3, MAPKKK3, MEKK3, putative	2			0.284258	0.166555															ISCW008104-PA	small nuclear ribonucleoprotein G, putative	1	K11099 small nuclear ribonucleoprotein G	Spliceosome		9.22729
				ISCW020986-PA	mll protein, putative	1				4.12671															ISCW011438-PA	RNA-binding protein musashi, putative	6	K12741 heterogeneous nuclear ribonucleoprotein A1/A3	Spliceosome	0.323864	0.335888
				ISCW018189-PA	monocarboxylate transporter, putative	1			0.030537	0.0160185															ISCW010835-PA	splicing factor 3A, putative	1	K12827 splicing factor 3A subunit 3	Spliceosome		No Chg
				ISCW006748-PA	neurofilament medium polypeptide, putative	4			0.10799	4.26412															ISCW009360-PA	splicing factor 3B subunit, putative	1	K12828 splicing factor 3B subunit 1	Spliceosome		0.327158
				ISCW005049-PA	nono protein, putative	1			0.1	0.1															ISCW019664-PA	U2 snRNP splicing factor, small subunit, putative	1	K12836 splicing factor U2AF 35 kDa subunit	Spliceosome		10.7079
				ISCW014710-PA	phosphatidylethanolamine-binding protein, putative	1				12.6006															ISCW002946-PA	splicing factor u2af large subunit, putative	2	K12837 splicing factor U2AF 65 kDa subunit	Spliceosome	No Chg	No Chg
				ISCW022925-PA	phosphoenolpyruvate carboxylase kinase, putative	1			11.5015																ISCW021269-PA	u4/u6 small nuclear ribonucleoprotein, putative	1	K12843 U4/U6 small nuclear ribonucleoprotein PRP3	Spliceosome	2.2998	2.03311
				ISCW001498-PA	phosphoinositol 3-phosphate-binding protein, putative	1			4.70576	0.310686															ISCW001209-PA	transformation upregulated nuclear protein, putative	1	K12886 heterogeneous nuclear ribonucleoprotein K	Spliceosome	0.149417	0.193266
				ISCW006172-PA	phosphoprotein/coiled-coil protein, putative	1			0.1	0.103403															ISCW001255-PA	IFN-response element binding factor, putative	2	K12891 splicing factor, arginine/serine-rich 2	Spliceosome	No Chg	No Chg
				ISCW001788-PA	prohibitin, putative	1																			ISCW006562-PA	RSZp22 protein, putative	2	K12896 splicing factor, arginine/serine-rich 7	Spliceosome	0.125648	0.136362
				ISCW021457-PA	prohibitin, putative	1			0.19148	0.208923															ISCW010309-PA	transformer-2 protein C, putative	1	K12897 transformer-2 protein	Spliceosome	10.8341	No Chg
				ISCW011739-PA	prostate-specific transglutaminase, putative	1			11.5015																ISCW017456-PA	heat shock protein, putative	18	K03283 heat shock 70kDa protein 1/8	Spliceosome""Protein processing in endoplasmic reticulum"" Endocytosis	No Chg	No Chg
				ISCW012814-PA	proteasome subunit alpha type, putative	1			0.111686	0.111893															ISCW024910-PA	heat shock protein, putative	1	K03283 heat shock 70kDa protein 1/8	Spliceosome""Protein processing in endoplasmic reticulum""Endocytosis		9.11374
				ISCW021572-PA	proteasome subunit alpha type, putative	2			11.3505	No Chg															ISCW006968-PA	small nuclear ribonucleoprotein Sm D1, putative	1	K11087 small nuclear ribonucleoprotein D1	Spliceosome""Sm core complex
				ISCW008949-PA	proteasome, subunit beta, putative	1				0.151543															ISCW020196-PA	fumarylacetoacetase, putative	2	K01555 fumarylacetoacetase	Tyrosine metabolism	9.58611	10.6753
				ISCW000621-PA	protein hu-li tai shao, putative	3			0.146331	0.112892															ISCW019123-PA	ubiquitin-activating enzyme E1, putative	4	K03178 ubiquitin-activating enzyme E1	Ubiquitin mediated proteolysis	No Chg	4.8498
				ISCW010157-PA	protein involved in membrane traffic, putative	1			No Chg	0.1															ISCW006743-PA	ubiquitin protein ligase, putative	1	K10580 ubiquitin-conjugating enzyme E2 N	Ubiquitin mediated proteolysis	9.6386
				ISCW012547-PA	pygopus, putative	1			0.219416																ISCW012877-PA	ubiquitin-conjugating enzyme, putative	1	K10581 ubiquitin-conjugating enzyme E2 O	Ubiquitin mediated proteolysis		0.264864
				ISCW023109-PA	quinone oxidoreductase, putative	2			0.382383	No Chg															ISCW018551-PA	ubiquitin protein ligase	1	K06689 ubiquitin-conjugating enzyme E2 D/E	Ubiquitin mediated proteolysis""Protein processing in endoplasmic reticulum		No Chg
				ISCW021858-PA	radixin, moesin, putative	4			0.130687	0.334332															ISCW013691-PA	calcyclin-binding protein CacyBP, putative	2	K04507 calcyclin binding protein	Wnt signaling pathway	0.43837	2.20443
				ISCW016612-PA	Ran-binding protein, putative	1				9.8611															ISCW013993-PA	small nuclear ribonucleoprotein E, putative	1	K11097 small nuclear ribonucleoprotein E	Spliceosome	0.367061
				ISCW015987-PA	ras GTP exchange factor, putative	1			0.12257	0.395405
				ISCW017252-PA	reticulocalbin, putative	1				0.1
				ISCW004407-PA	reticulon/nogo, putative	4			0.48586	No Chg
				ISCW001285-PA	ribosomal protein L34, putative	1			0.1	0.1
				ISCW015020-PA	RNA binding motif-containing protein, putative	9			0.284	0.317197
				ISCW021398-PA	RNA binding motif-containing protein, putative	3			No Chg	No Chg
				ISCW016044-PA	RNA polymerase II second largest subunit (RPB2), putative	1			No Chg	No Chg
				ISCW021980-PA	RNA-binding protein precursor, putative	2			0.117668	0.100553
				ISCW006831-PA	RNA-binding protein, putative	2			No Chg	No Chg
				ISCW008767-PA	Scaffold attachment factor B1, putative	1			0.1	0.173374
				ISCW024717-PA	secreted salivary gland peptide, putative	5			No Chg	No Chg
				ISCW007070-PA	secretory protein, putative	2			0.1	No Chg
				ISCW000706-PA	SET and MYND domain-containing protein (SMYD), putative	1			No Chg
				ISCW017020-PA	short chain alcohol dehydrogenase, putative	1			0.1	0.1
				ISCW018577-PA	short-chain dehydrogenase, putative	3			No Chg	3.70784
				ISCW005414-PA	signal recognition particle receptor, putative	1
				ISCW016888-PA	single-stranded DNA binding protein P9, putative	1			0.267184	0.289445
				ISCW024922-PA	small heat shock protein, putative	1			2.25651	0.445033
				ISCW001616-PA	solute carrier, putative	1
				ISCW000499-PA	sorting nexin, putative	1			0.268498	0.1
				ISCW007267-PA	SOX transcription factor, putative	1			No Chg	No Chg
				ISCW023180-PA	splicing factor SC35, putative	1				9.03903
				ISCW018528-PA	steroid membrane receptor Hpr6.6/25-Dx, putative	1				No Chg
				ISCW007336-PA	sulfotransferase, putative	1			0.149287
				ISCW012382-PA	superoxide dismutase Cu-Zn, putative	1				No Chg
				ISCW016709-PA	tetratricopeptide repeat protein, tpr, putative	1			0.1	No Chg
				ISCW009878-PA	thiol-disulfide isomerase, putative	3			No Chg	0.380449
				ISCW003347-PA	tip120, putative	1			No Chg	No Chg
				ISCW024497-PA	Translationally-controlled tumor protein homolog (TCTP)	1			No Chg	No Chg
				ISCW014194-PA	transmembrane protein, putative	1				No Chg
				ISCW019640-PA	transmembrane protein, putative	1				10.2797
				ISCW020449-PA	transposase, putative	1				0.228738
				ISCW016025-PA	tRNA synthetases class II, putative	1			0.45763
				ISCW008202-PA	tropomyosin invertebrate, putative	1			0.1	0.139884
				ISCW008384-PA	two component histidine kinase, putative	1				No Chg
				ISCW011870-PA	UBX domain-containing protein, putative	1			0.1	No Chg
				ISCW022270-PA	VAMP-associated protein involved in inositol metabolism, putative	2			0.213674	No Chg
				ISCW021859-PA	VEGF183 protein, putative	1			0.237277	0.1
				ISCW013727-PA	vitellogenin, putative	2			0.360406	0.091318
				ISCW011023-PA	WD-repeat protein, putative	1				10.7078
				ISCW007897-PA	Whdc1 protein, putative	1
				ISCW017474-PA	zinc binding dehydrogenase, putative	1			8.42769
				ISCW006646-PA	zinc finger protein, putative	1
				ISCW010362-PA	zinc finger protein, putative	1
				ISCW008027-PA	zinc finger protein, putative	1			0.00603477	0.000789846
